# Supplementary material for: Synthesis and Spectroscopic Characterization of Selected Phenothiazines and Phenazines Rationalized Based on DFT Calculation
Source: MDPI journal article supplement (doi:10.3390/molecules27217519), 2022-11-04
Supplement: s1 [file s1]

# Synthesis and Spectroscopic Characterization of Selected Phenothiazines and Phenazines Rationalized Based on DFT calculation

Daniel Swoboda<sup>1</sup>, Jacek E. Nycz<sup>1,\*</sup> Nataliya Karaush-Karmazin<sup>2</sup>, Boris Minaev<sup>2</sup>, Maria Książek<sup>3</sup>, Joachim Kusz<sup>3</sup> and Radosław Podsiadły<sup>4</sup>

<sup>1</sup> Institute of Chemistry, Faculty of Science and Technology, University of Silesia in Katowice, ul. Szkolna 9; PL-40007 Katowice, Poland

<sup>2</sup> Department of Chemistry and Nanomaterials Science, Bohdan Khmelnytsky National University, 18031 Cherkasy, Ukraine

<sup>3</sup> Institute of Physics, Faculty of Science and Technology, University of Silesia in Katowice, 75 Pułku Piechoty 1a, 41-500 Chorzów, Poland

<sup>4</sup> Institute of Polymer and Dye Technology, Faculty of Chemistry, Lodz University of Technology, Stefanowskiego 12/16, 90-924, Lodz, Poland

\* Correspondence: jacek.nycz@us.edu.pl; Tel.: +48-32-359-1446

## Table of Contents

**Figures S1–S6.** The optimized molecular structures of molecules **1**, **2a**, **3**, **5** and **6a** in the  $S_0$  and  $S_1$  states

**Figures S7–S8.** TDDFT/B3LYP/6-31G(d,p) simulated absorption spectra of molecules **2a** and **3**

**Figures S9–S10.** Molecular orbitals for the molecules **2a** and **3** calculated at the TDDFT/B3LYP/6-31G(d,p) level of theory.

**Figure S11.** The structure and energies of the two possible conformers for **2a**.

**Figures S12a–f.**  $^1\text{H}$ ,  $^{13}\text{C}\{^1\text{H}\}$  NMR; MS and HRMS spectra of the **2a**.

**Figures S13a–d.**  $^1\text{H}$ ,  $^{13}\text{C}\{^1\text{H}\}$  NMR; MS and HRMS spectra of the **5**.

**Figures S14a–d.**  $^1\text{H}$ ,  $^{13}\text{C}\{^1\text{H}\}$  NMR; MS and HRMS spectra of the **6a**.

**Figures S15a–d.**  $^1\text{H}$ ,  $^{13}\text{C}\{^1\text{H}\}$  NMR; MS and HRMS spectra of the **6b**.

**Figures S16a–d.**  $^1\text{H}$ ,  $^{13}\text{C}\{^1\text{H}\}$  NMR; MS and HRMS spectra of the **6c**.

**Figures S17a–d.**  $^1\text{H}$ ,  $^{13}\text{C}\{^1\text{H}\}$  NMR; MS and HRMS spectra of the **6d**.

**Figures S18a–d.**  $^1\text{H}$ ,  $^{13}\text{C}\{^1\text{H}\}$  NMR; MS and HRMS spectra of the **6e**.

**Table S1.** Wavelengths ( $\lambda$ ), oscillator strengths ( $f$ ) and orbital assignment of the selected electronic transitions in the absorption spectra of molecules **2a** and **3** calculated at the TDDFT/B3LYP/6-31G(d,p) level of theory.

**Table S2.** Spectroscopic data of the  $S_1$ – $S_0$  electronic transition in the emission spectra of compounds **2a** and **3**.

**Table S3.** Crystal data and structure refinement details of compounds **1**, **2a**, **2b**, **3**, **5** and **6a**.

**Tables S4–S9.** Geometric parameters for **1**, **2a**, **2b**, **3**, **5**, **6a**.

**Table S10.** The experimental aromatic  $^1\text{H}$  chemical shifts of compounds **1**, **2**, **3**, **5** and **6**.

**Table S11.** The experimental aromatic  $^{13}\text{C}\{^1\text{H}\}$  chemical shifts of compounds **1**, **2**, **3**, **5** and **6**.

**Tables S12-S16.** Optimized Cartesian coordinates of the **1**, **2a**, **3**, **5** and **6a**.

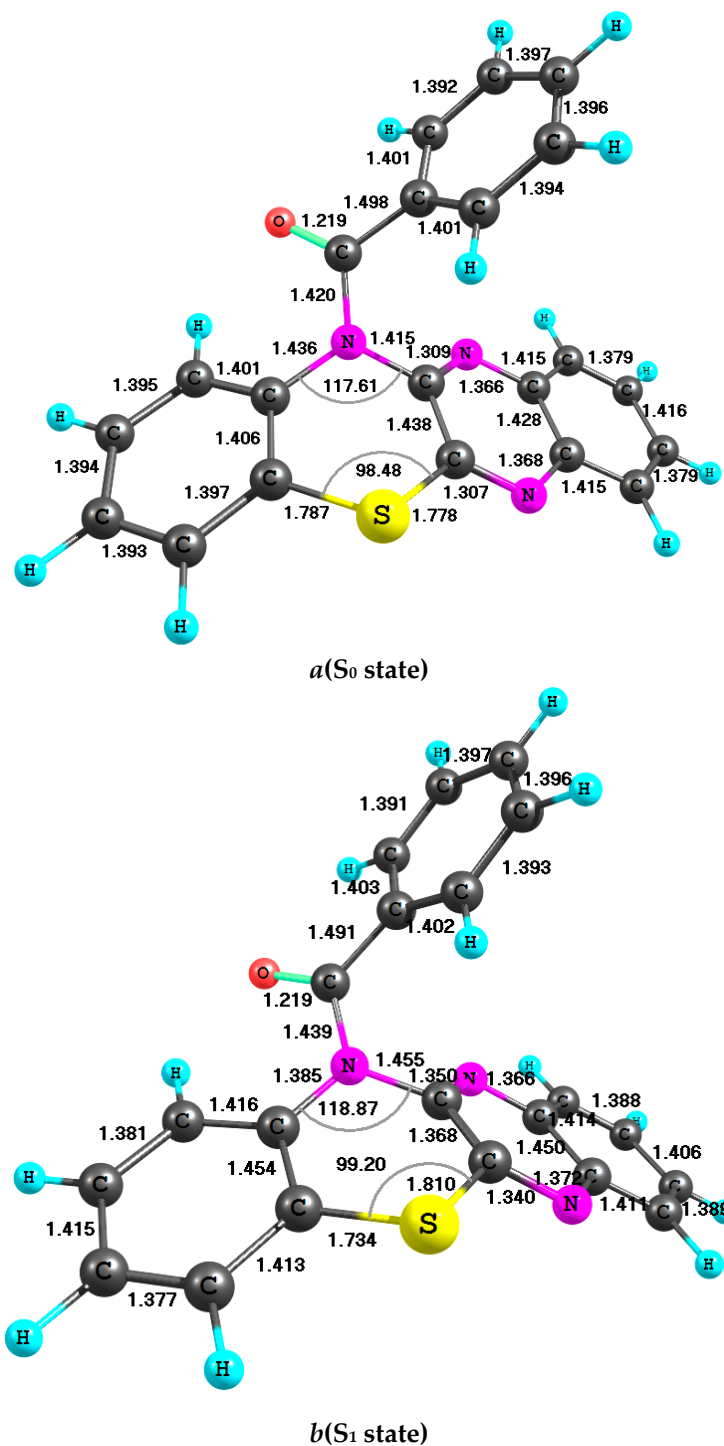

**Figure S1.** The optimized molecular structure and selected bond lengths (Å) and angles (°) of the **1** in the  $S_0$  (*a*) and  $S_1$  (*b*) states calculated at the B3LYP/6-31G(d,p) level of theory

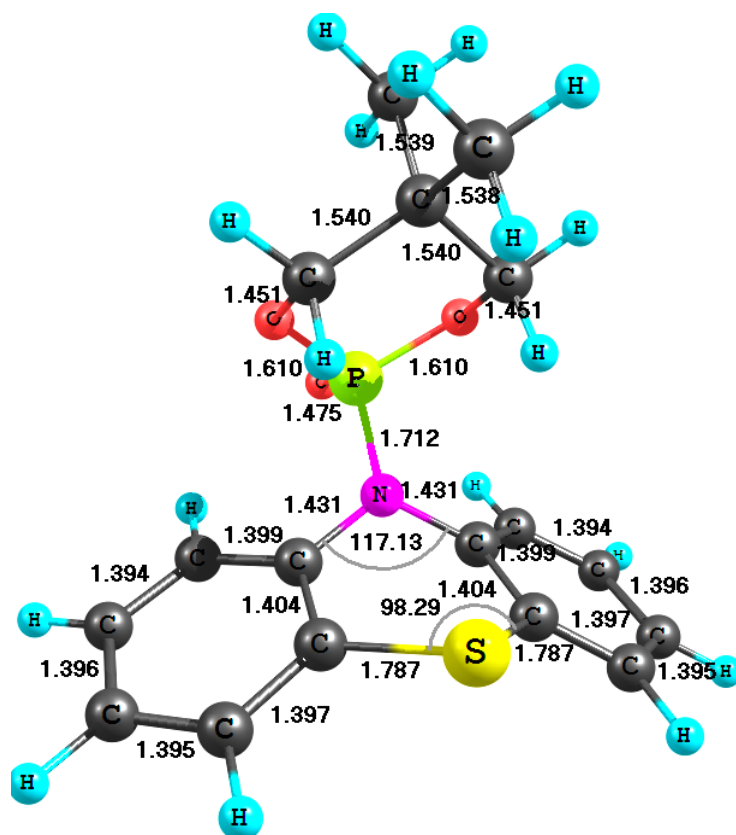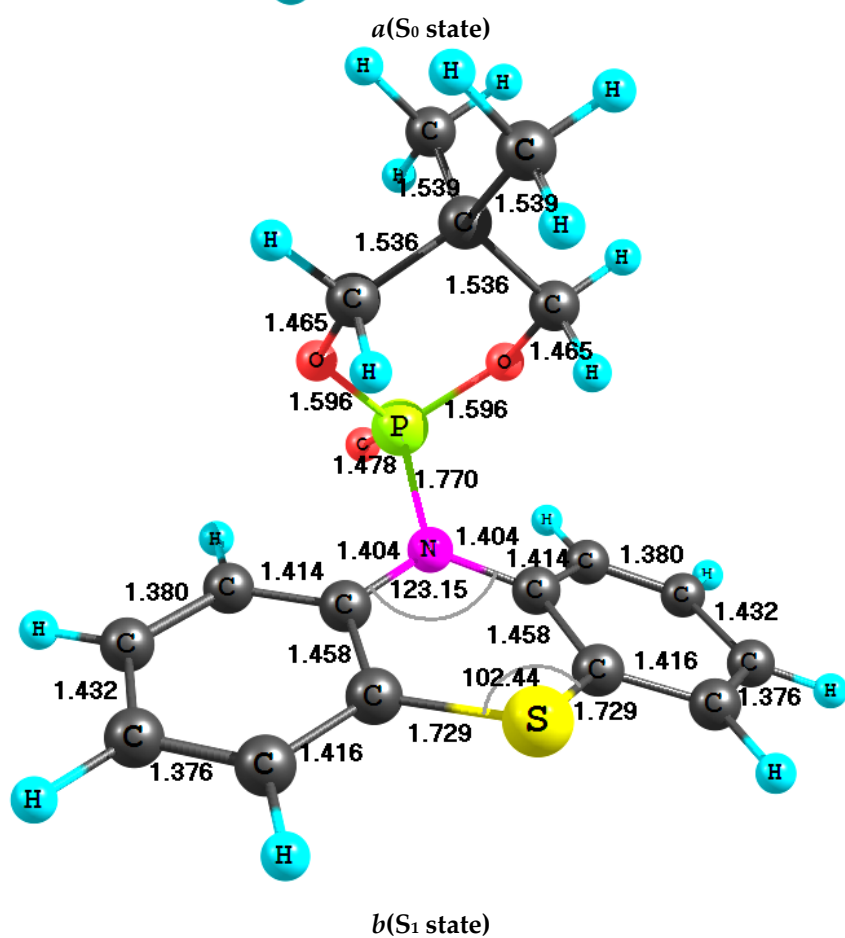

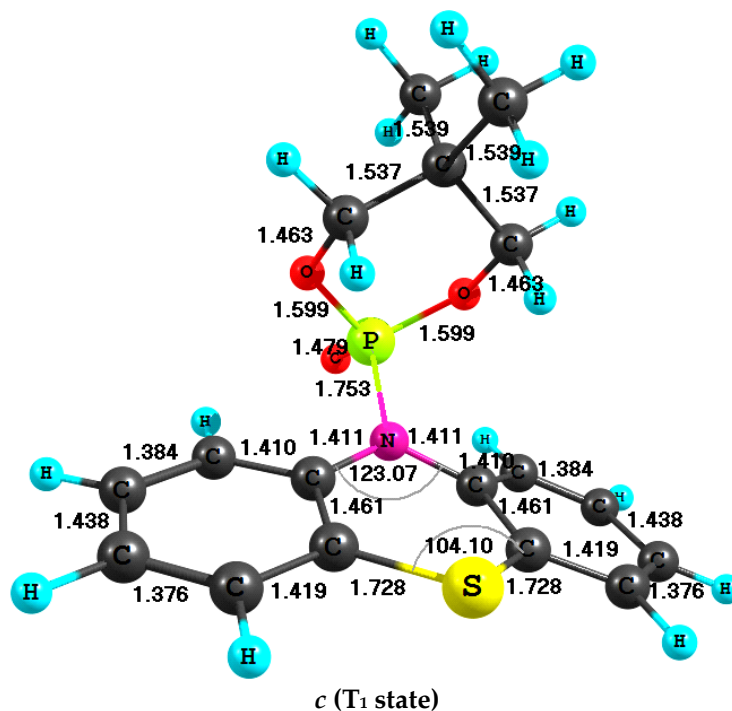

Figure S2. The optimized molecular structure and selected bond lengths (Å) and angles (°) of the 2a in the S<sub>0</sub> (a), S<sub>1</sub> (b) and T<sub>1</sub> (c) states calculated at the B3LYP/6-31G(d,p) level of theory

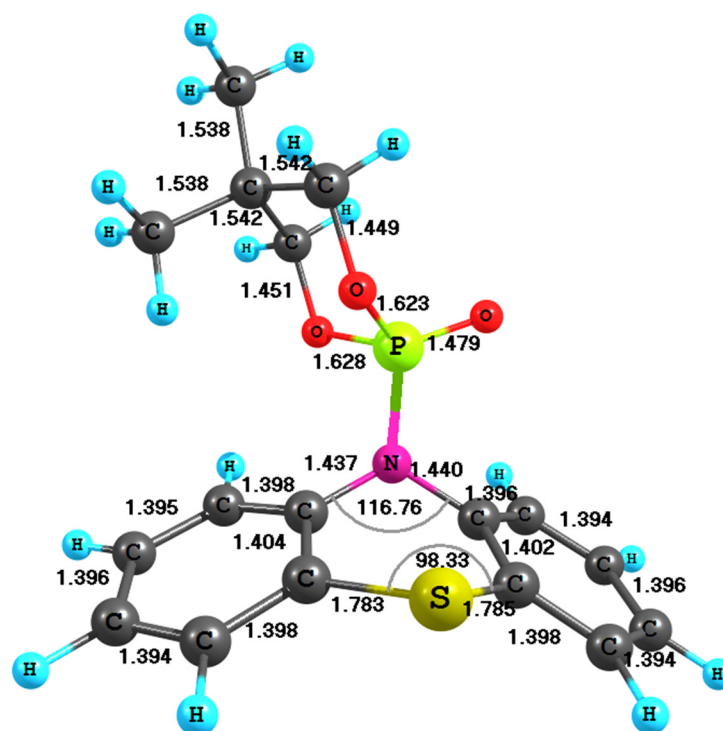

Figure S3. The optimized molecular structure and selected bond lengths (Å) and angles (°) of the 2a conformer in the S<sub>0</sub> state calculated at the B3LYP/6-31G(d,p) level of theory

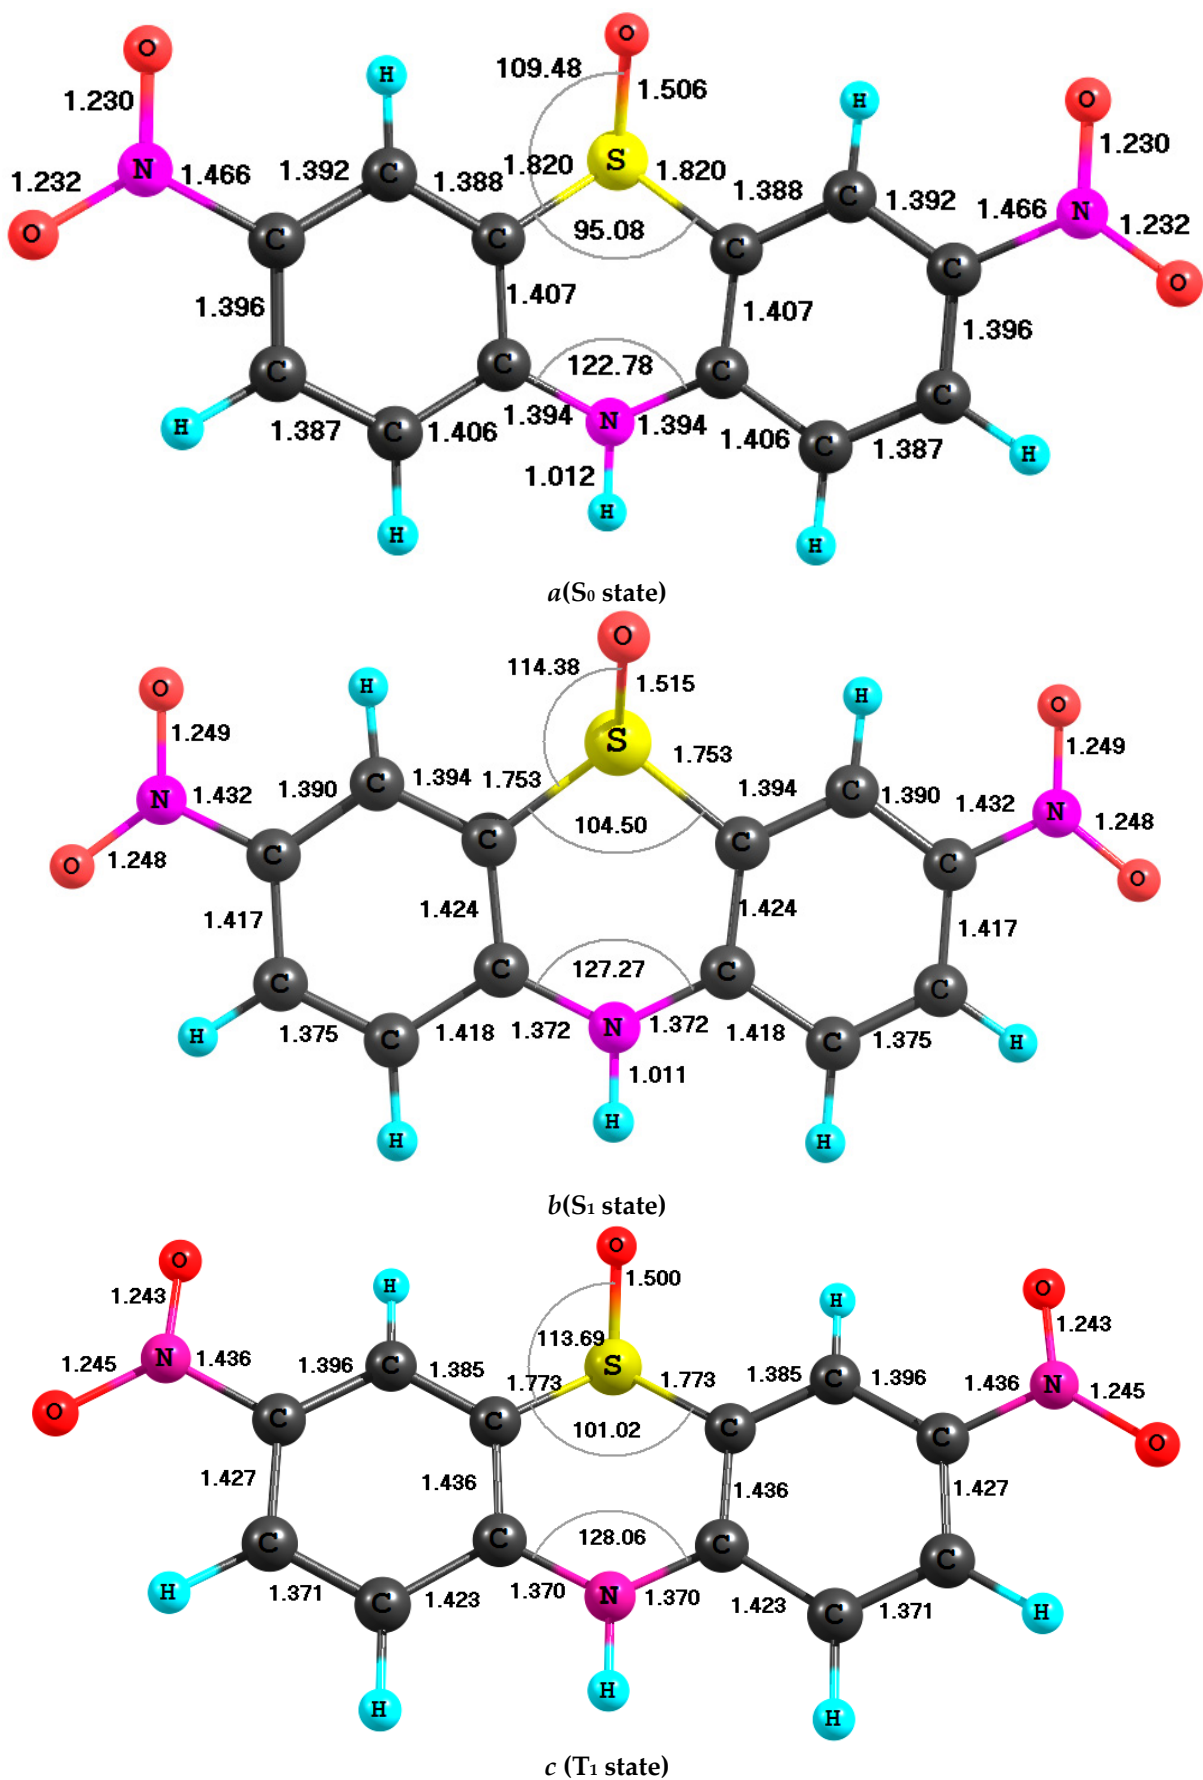

Figure S4. The optimized molecular structure and selected bond lengths (Å) and angles (°) of the 3 in the  $S_0$  (a),  $S_1$  (b) and  $T_1$  (c) states calculated at the B3LYP/6-31G(d,p) level of theory

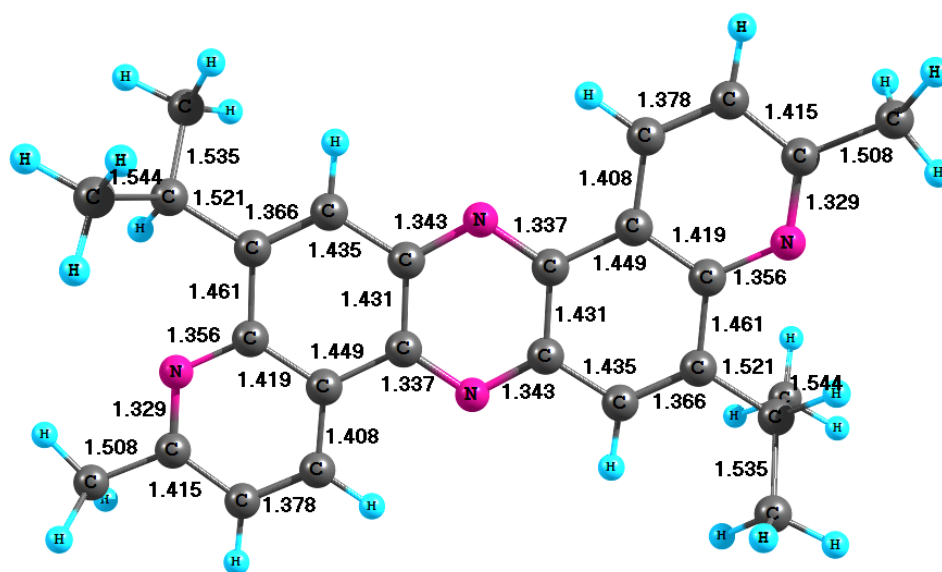

*a*(S<sub>0</sub> state)

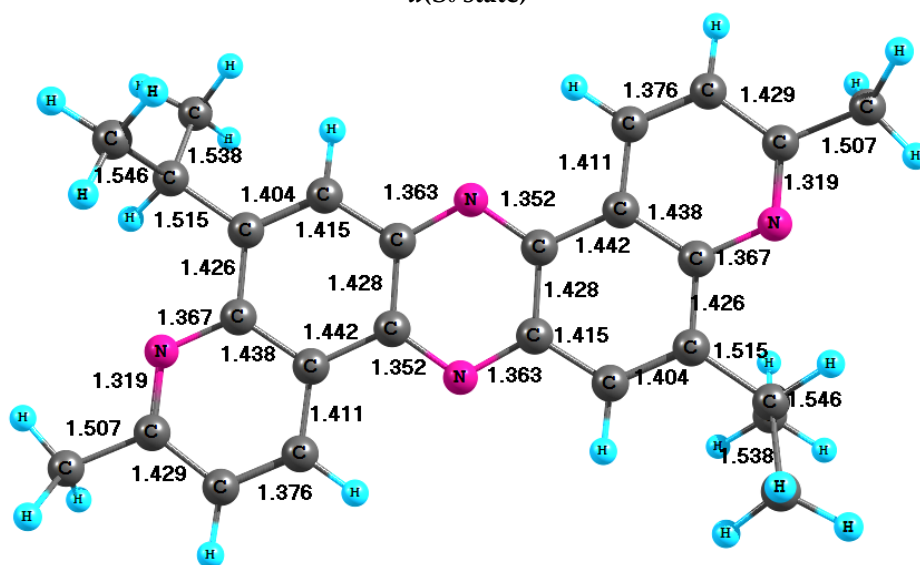

*b*(S<sub>1</sub> state)

Figure S5. The optimized molecular structure and selected bond lengths (Å) of the **5** in the S<sub>0</sub> (*a*) and S<sub>1</sub> (*b*) states calculated at the B3LYP/6-31G(d,p) level of theory

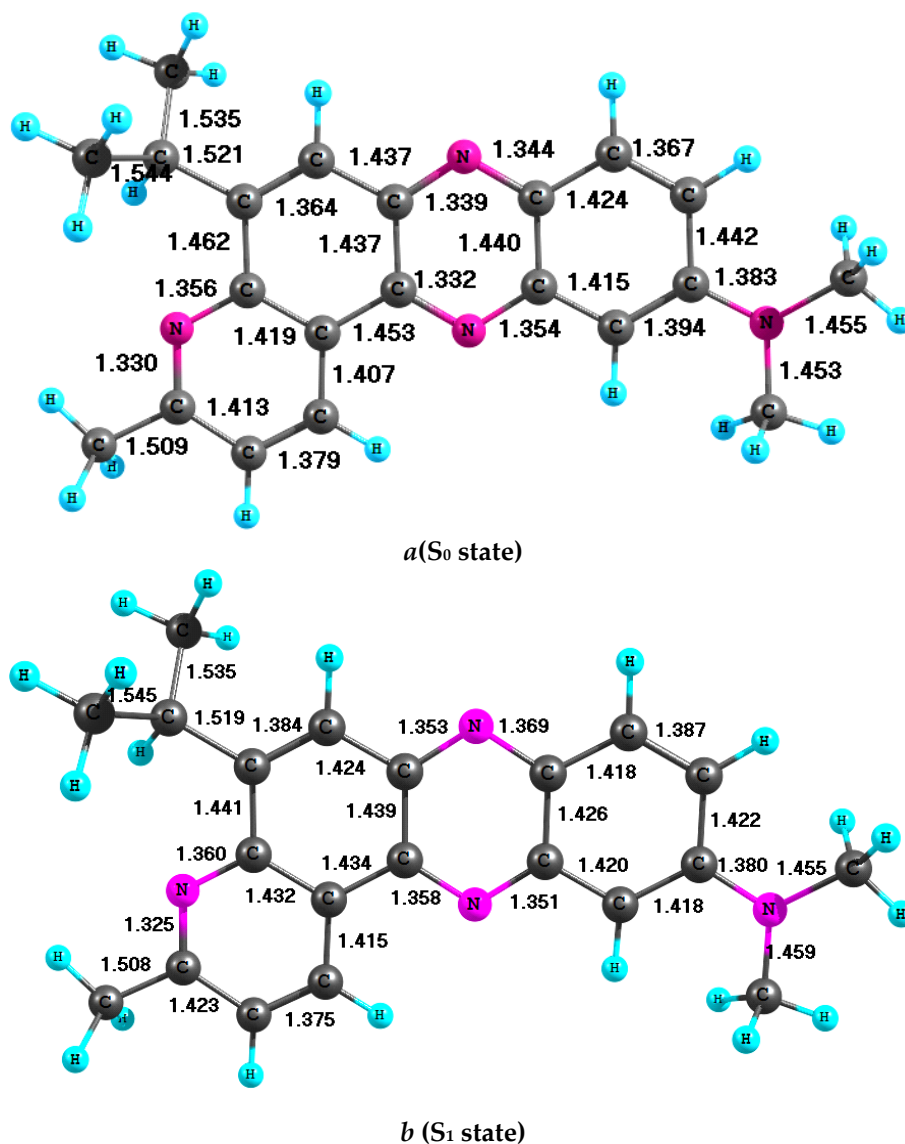

Figure S6. The optimized molecular structure and selected bond lengths (Å) of the 6a in the  $S_0$  (*a*) and  $S_1$  (*b*) states calculated at the B3LYP/6-31G(d,p) level of theory

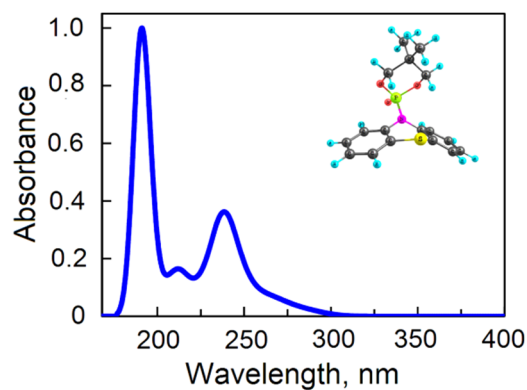

Figure S7. B3LYP/6-31G(d,p) simulated absorption spectra of the compound **2a** taking into account solvent effects (solvent – MeCN).



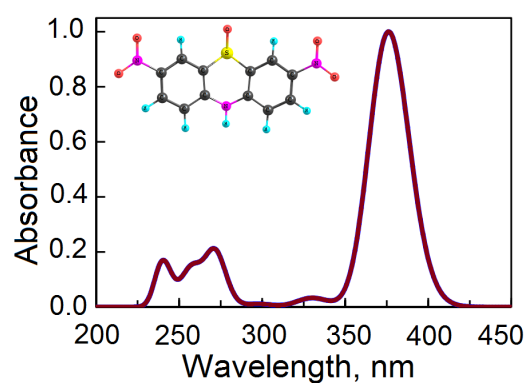

**Figure S8.** B3LYP/6-31G(d,p) simulated absorption spectra of the 3,7-dinitro-10*H*-phenothiazine 5-oxide (**3**) taking into account solvent effects (solvent – dimethylsulfoxide).

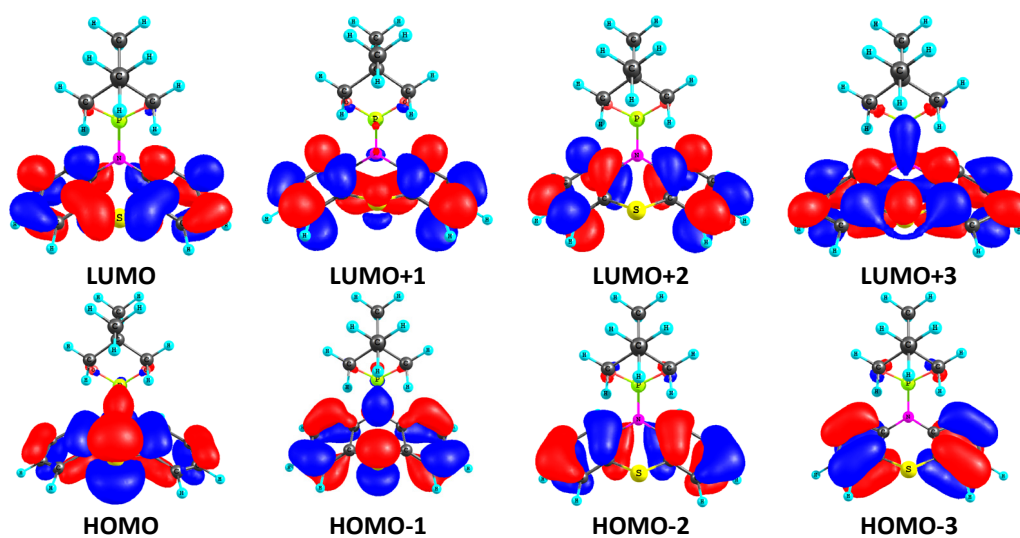

**Figure S9.** Molecular orbitals for **2a** calculated at the B3LYP/6-31G(d,p) level of theory.

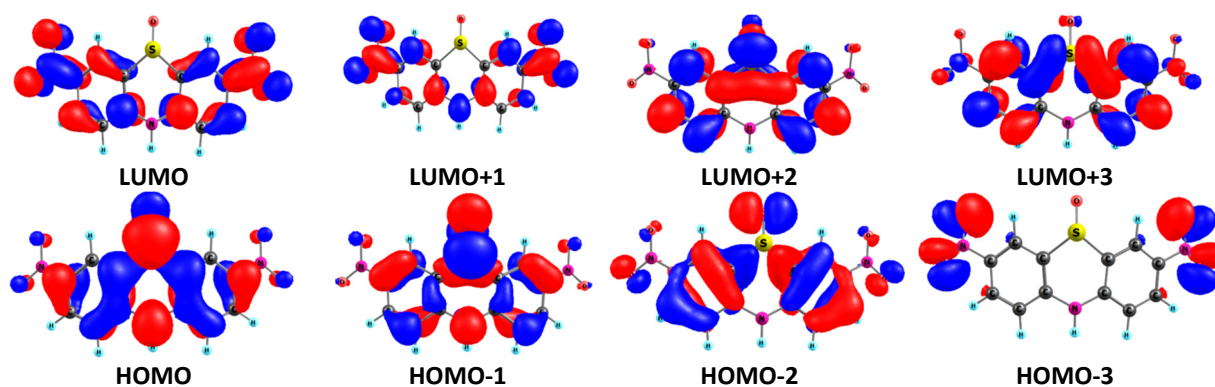



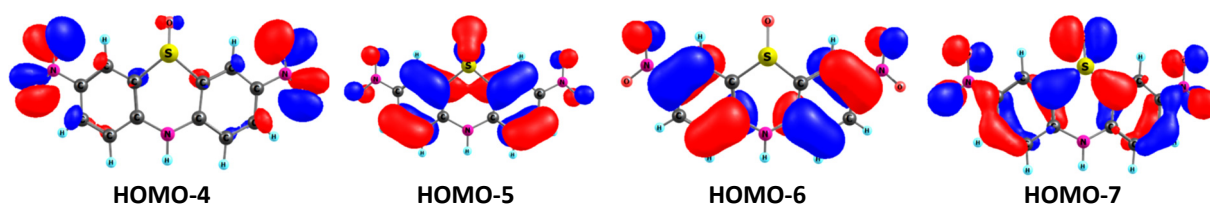

Figure S10. Molecular orbitals for 3 calculated at the B3LYP/6-31G(d,p) level of theory.

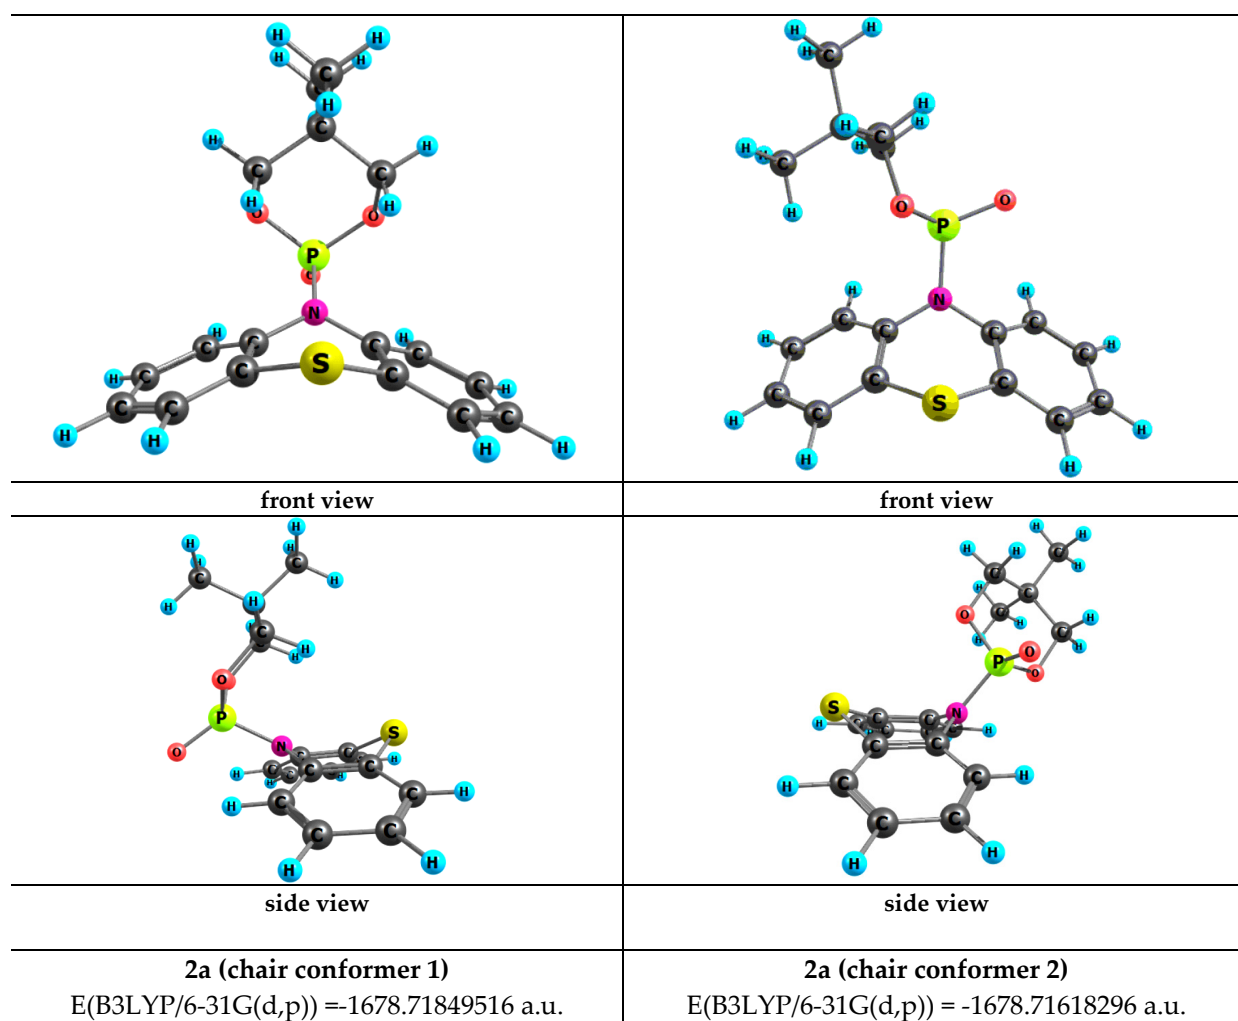

Figure S11. The structure and energies of the two possible conformers (gas-phase B3LYP/6-31G(d,p) calculation).

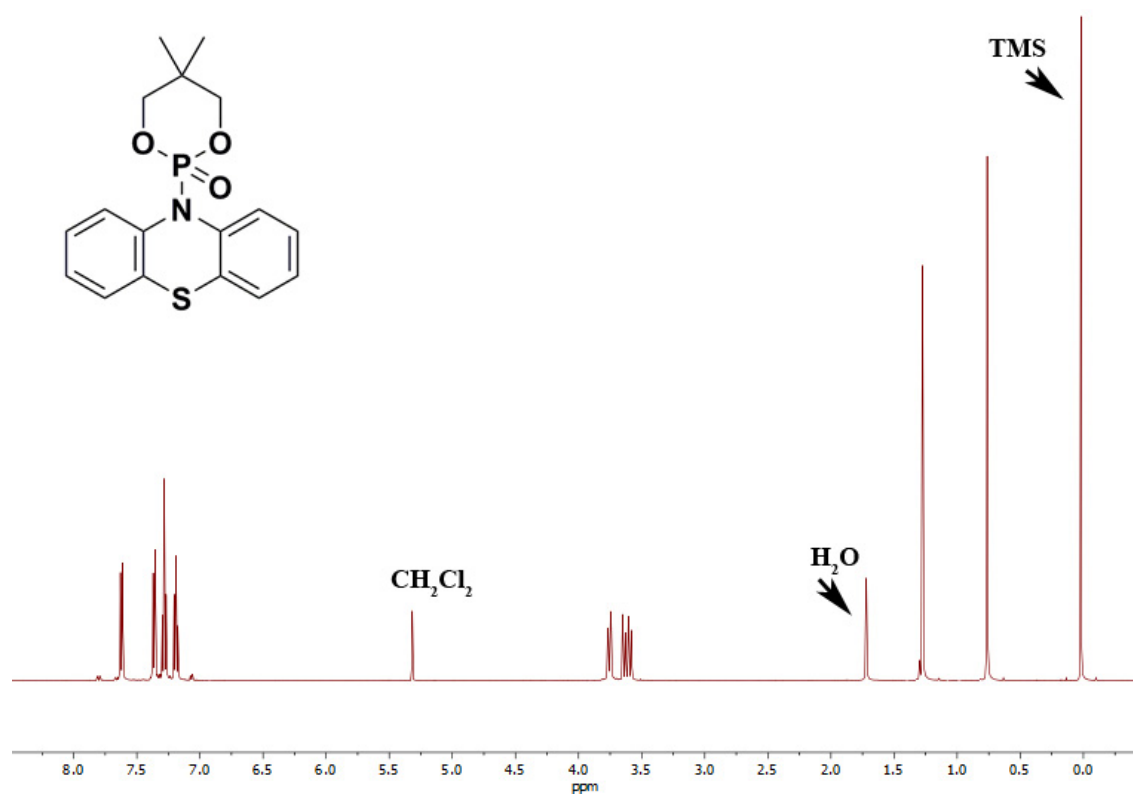

**Figure S12a.**  $^1\text{H}$ -NMR ( $\text{CDCl}_3$ ; 500.2 MHz) spectrum of the **2a**.

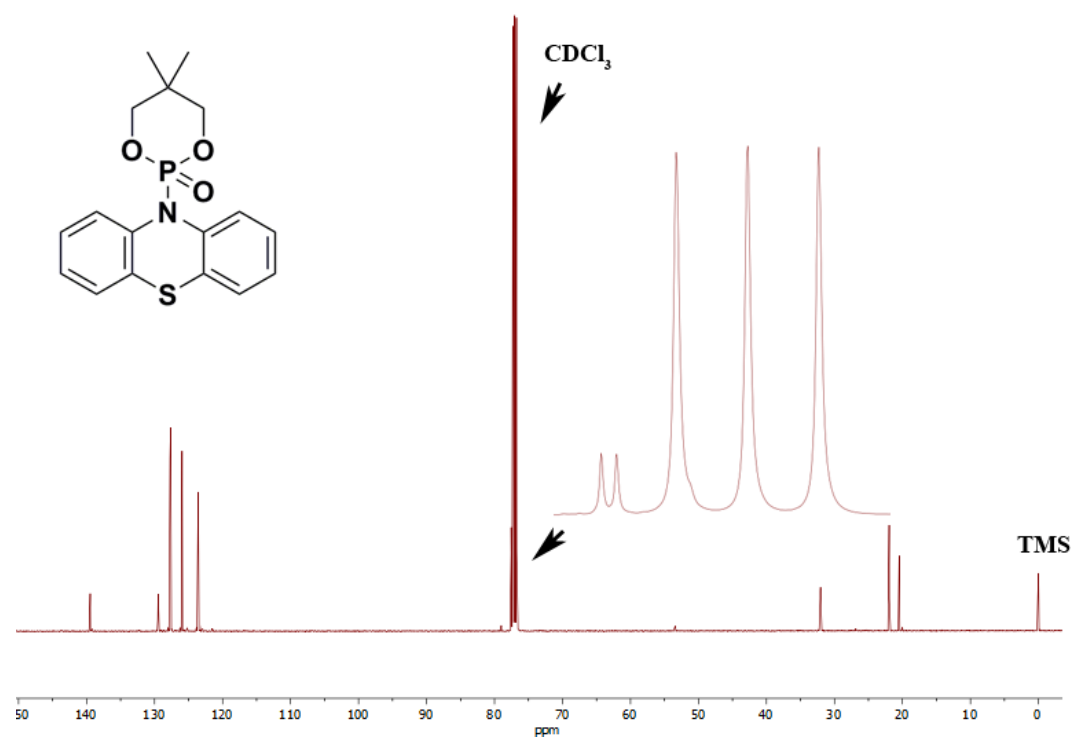

**Figure S12b.**  $^{13}\text{C}\{^1\text{H}\}$ -NMR ( $\text{CDCl}_3$ ; 125.8 MHz) spectrum of the **2a**.

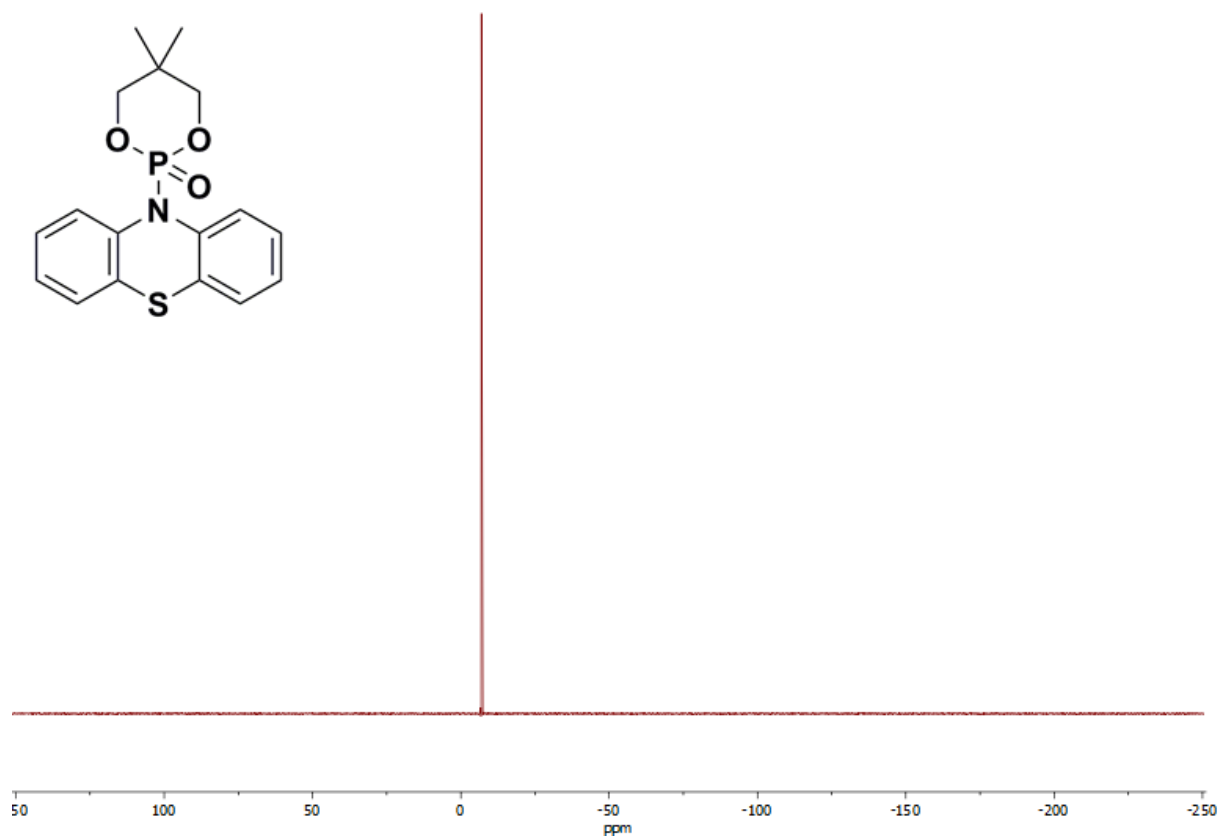

**Figure S12c.**  $^{31}\text{P}\{^1\text{H}\}$ -NMR ( $\text{CDCl}_3$ ; 202.5 MHz) spectrum of the **2a**.

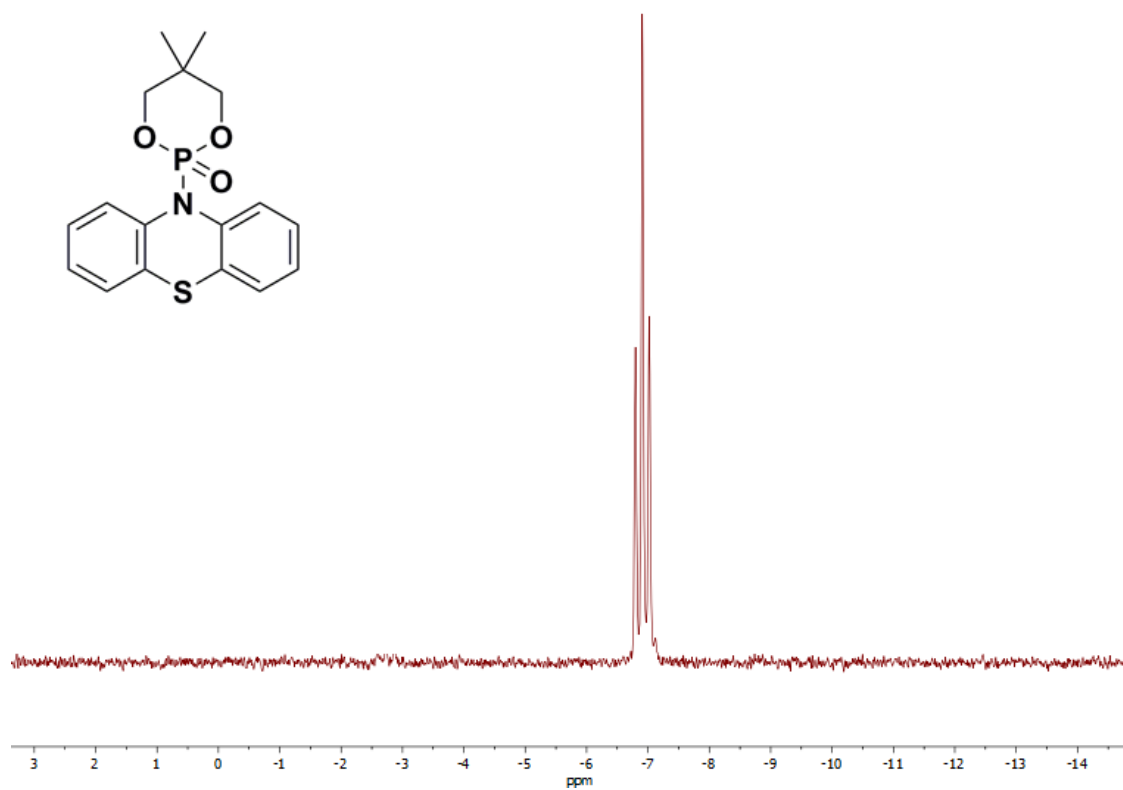

**Figure S12d.**  $^{31}\text{P}$ -NMR ( $\text{CDCl}_3$ ; 202.5 MHz) spectrum of the **2a**.

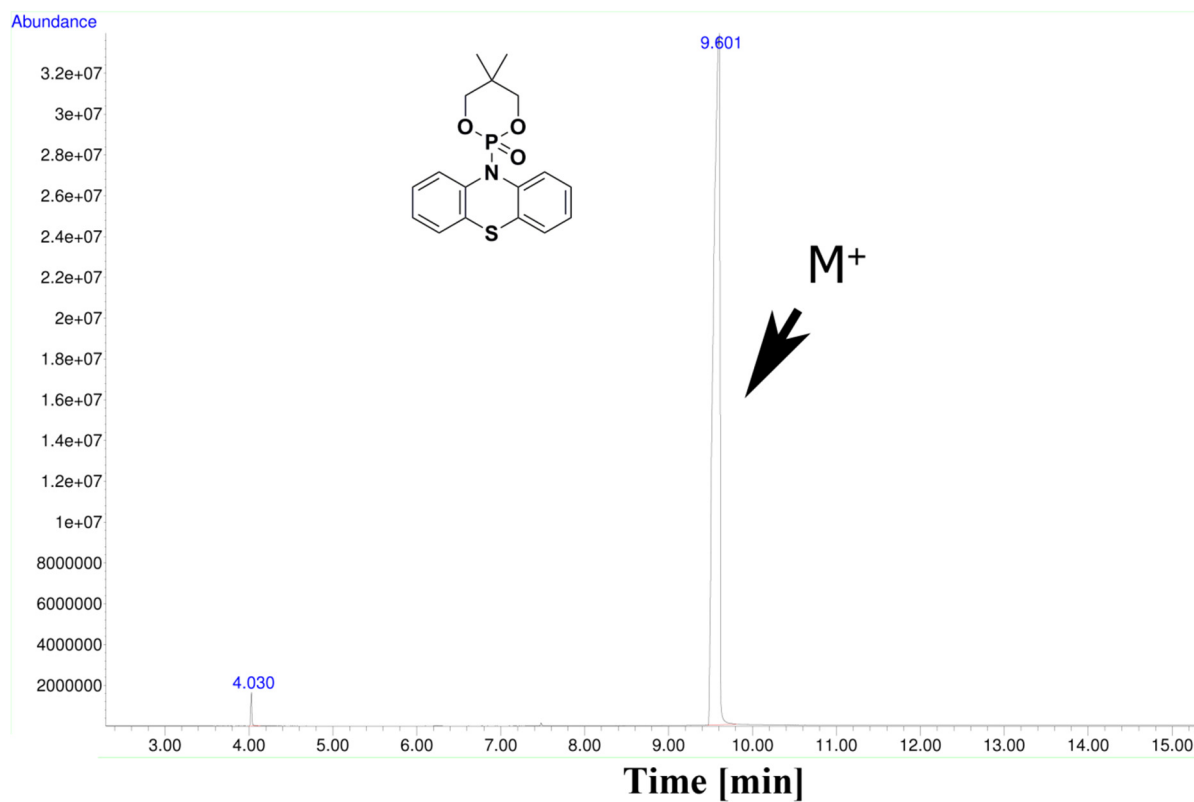

**Figure S12e.** Chromatogram of the molecule 2a.

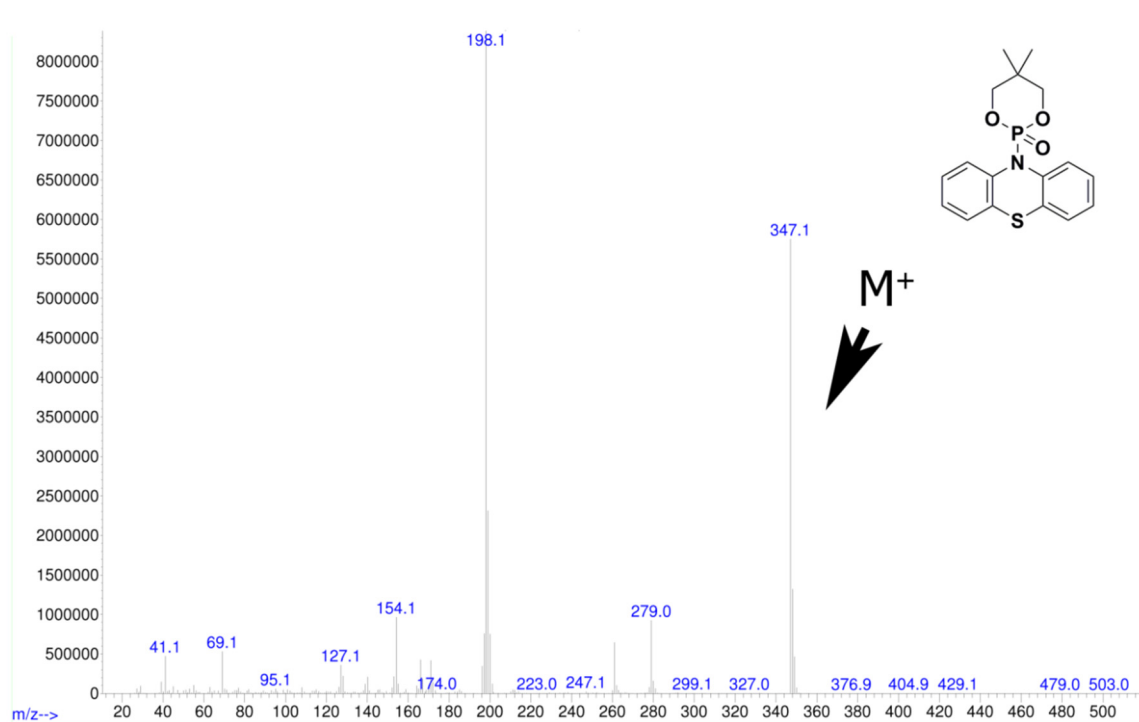

**Figure S12f.** MS spectrum of the molecule 2a.

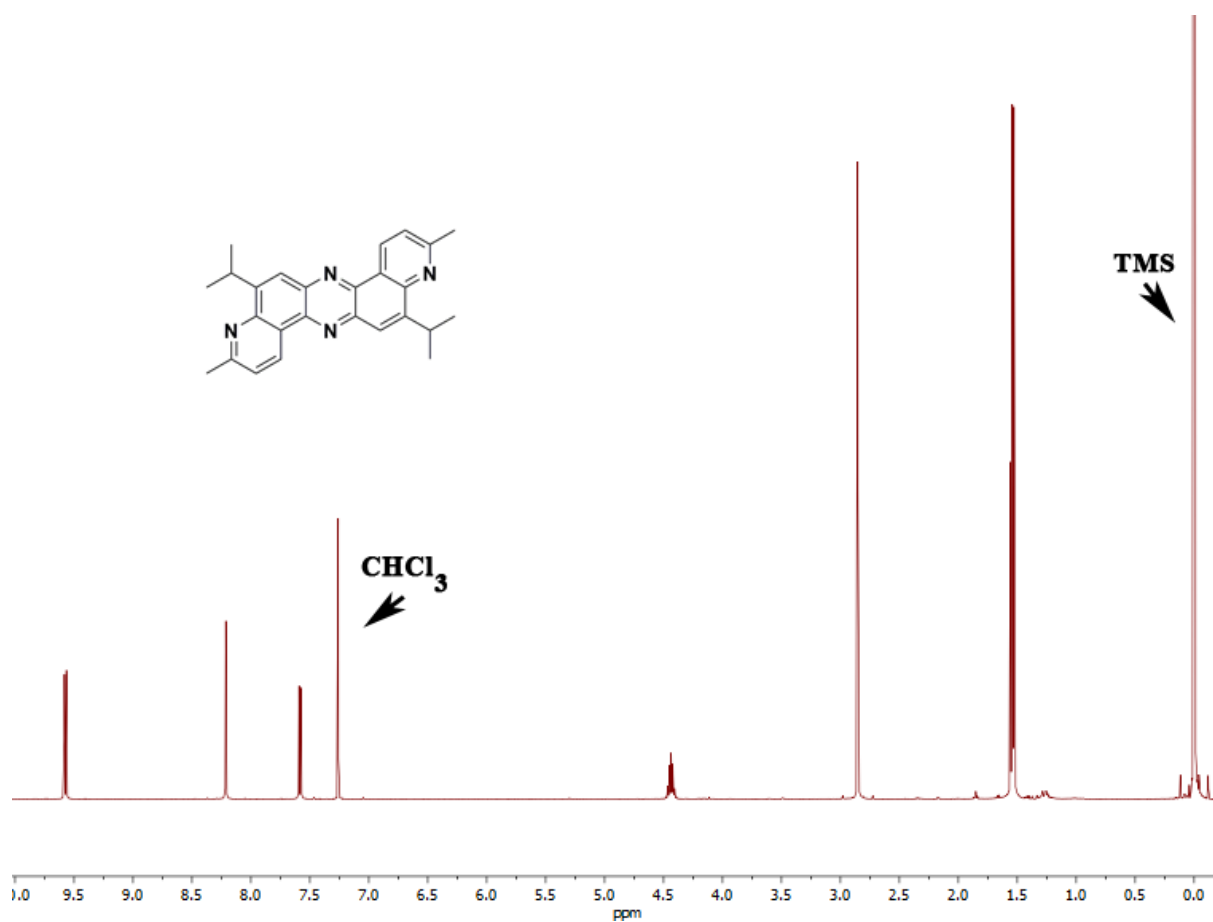

**Figure S13a.** <sup>1</sup>H-NMR (CDCl<sub>3</sub>; 500.2 MHz) spectrum of the **5**.

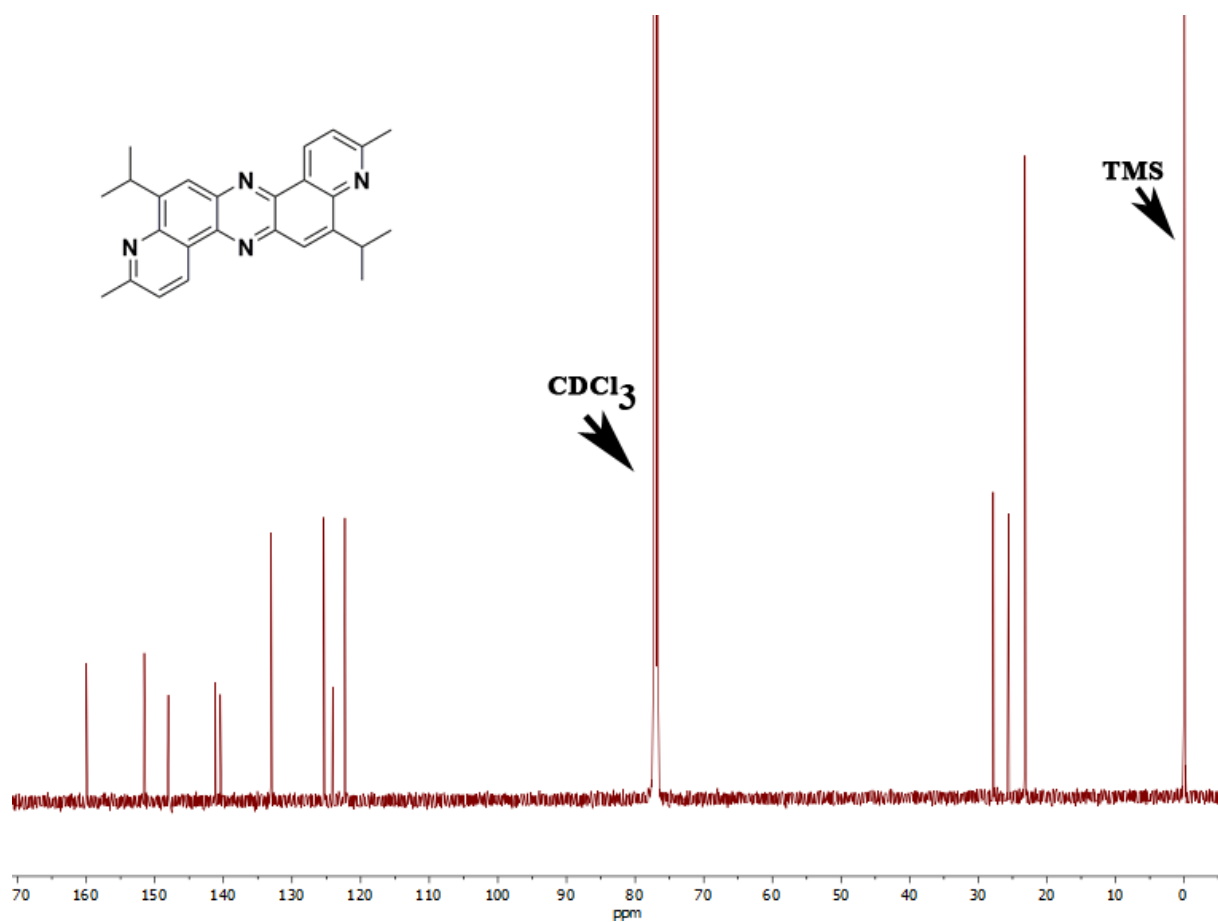

**Figure S13b.**  $^{13}\text{C}\{^1\text{H}\}$ -NMR ( $\text{CDCl}_3$ ; 125.8 MHz) spectrum of the **5**.

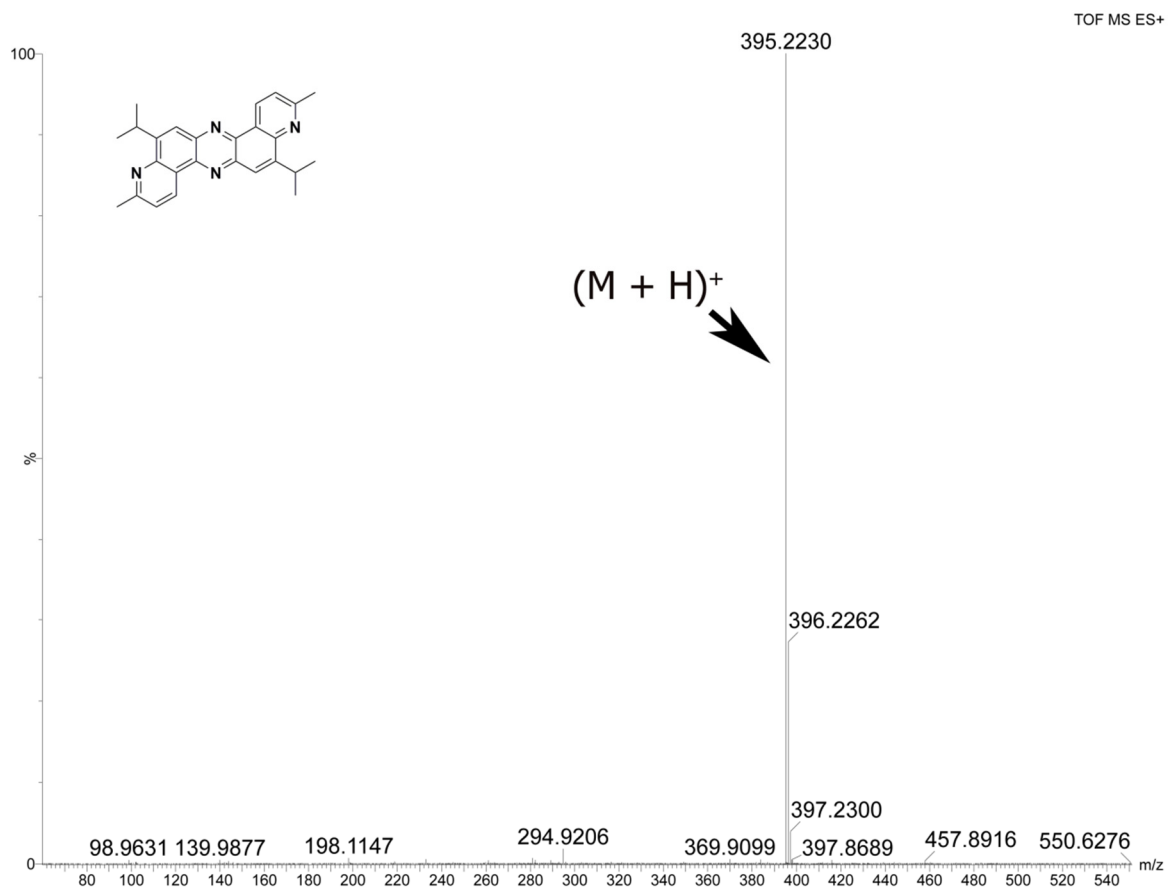

**Figure S13c.** MS spectrum of the molecule **5**.

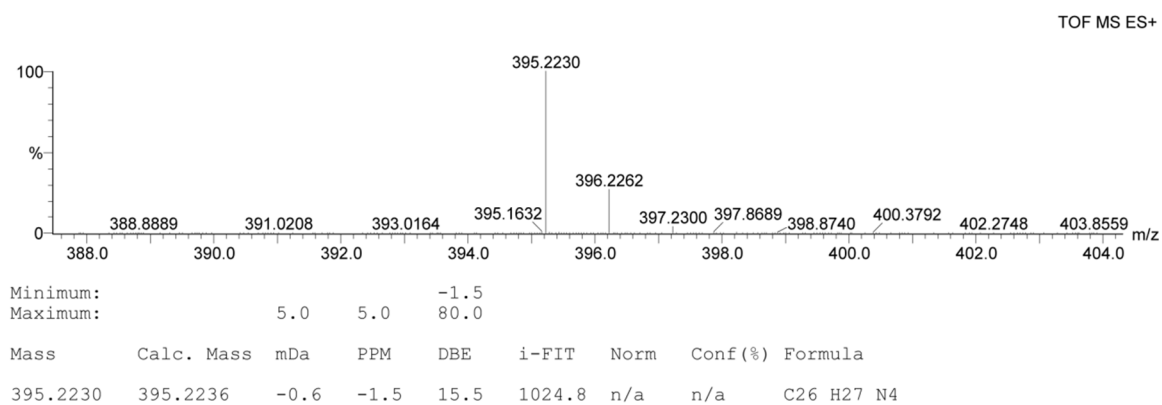

**Figure S13d.** HRMS spectrum of the molecule **5**.



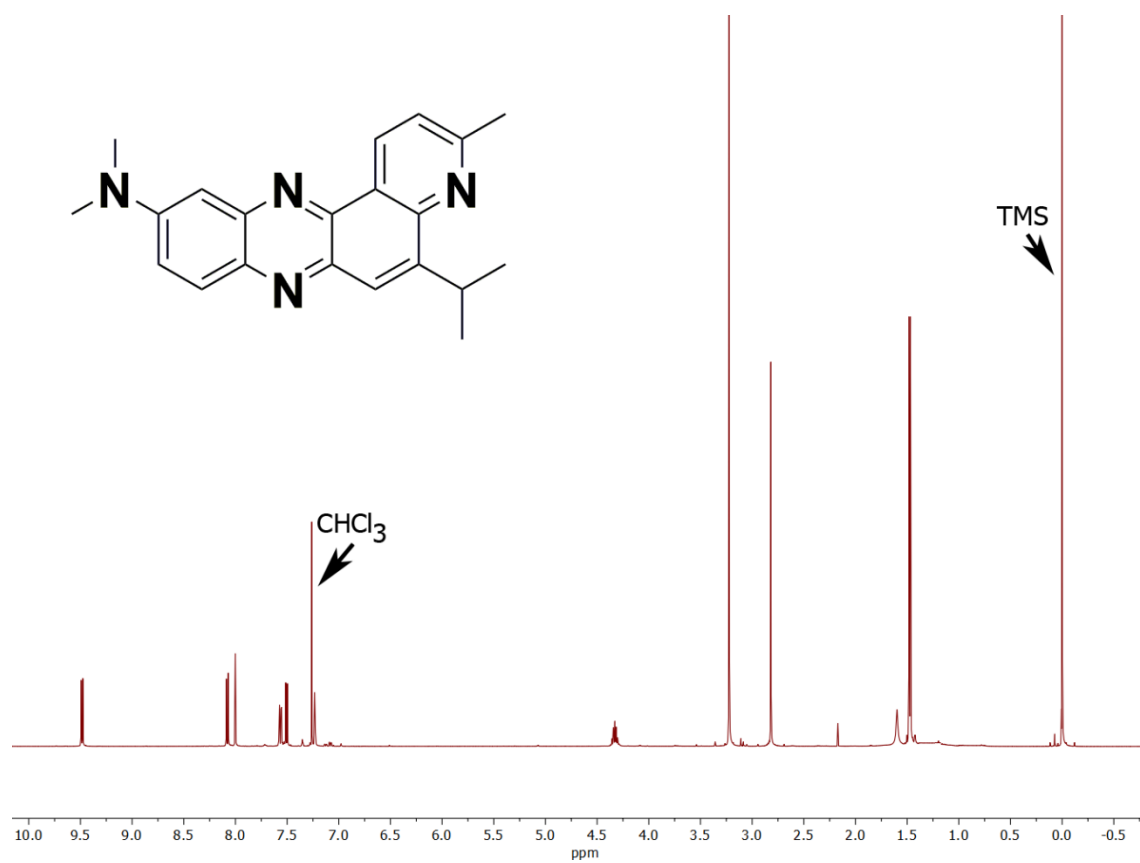

**Figure S14a.** <sup>1</sup>H-NMR (CDCl<sub>3</sub>; 500.2 MHz) spectrum of the **6a**.

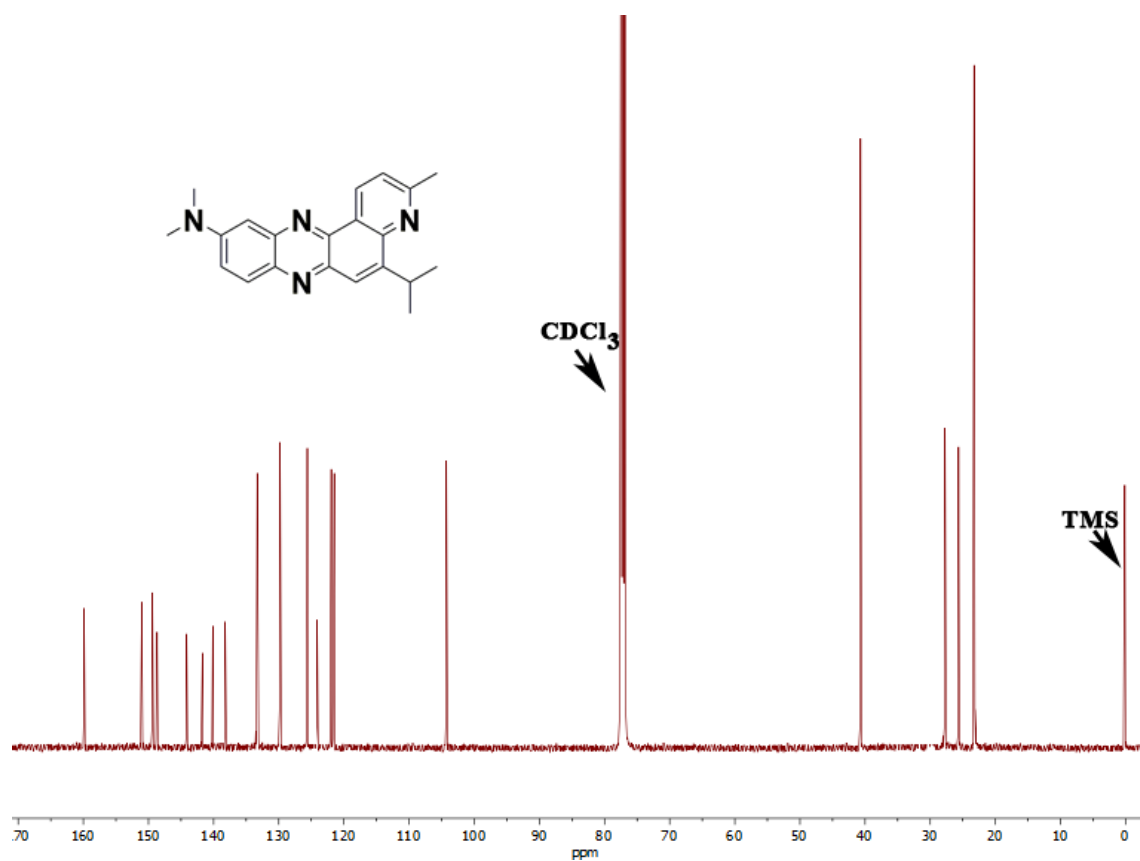

**Figure S14b.**  $^{13}\text{C}\{^1\text{H}\}$ -NMR ( $\text{CDCl}_3$ ; 125.8 MHz) spectrum of the **6a**.

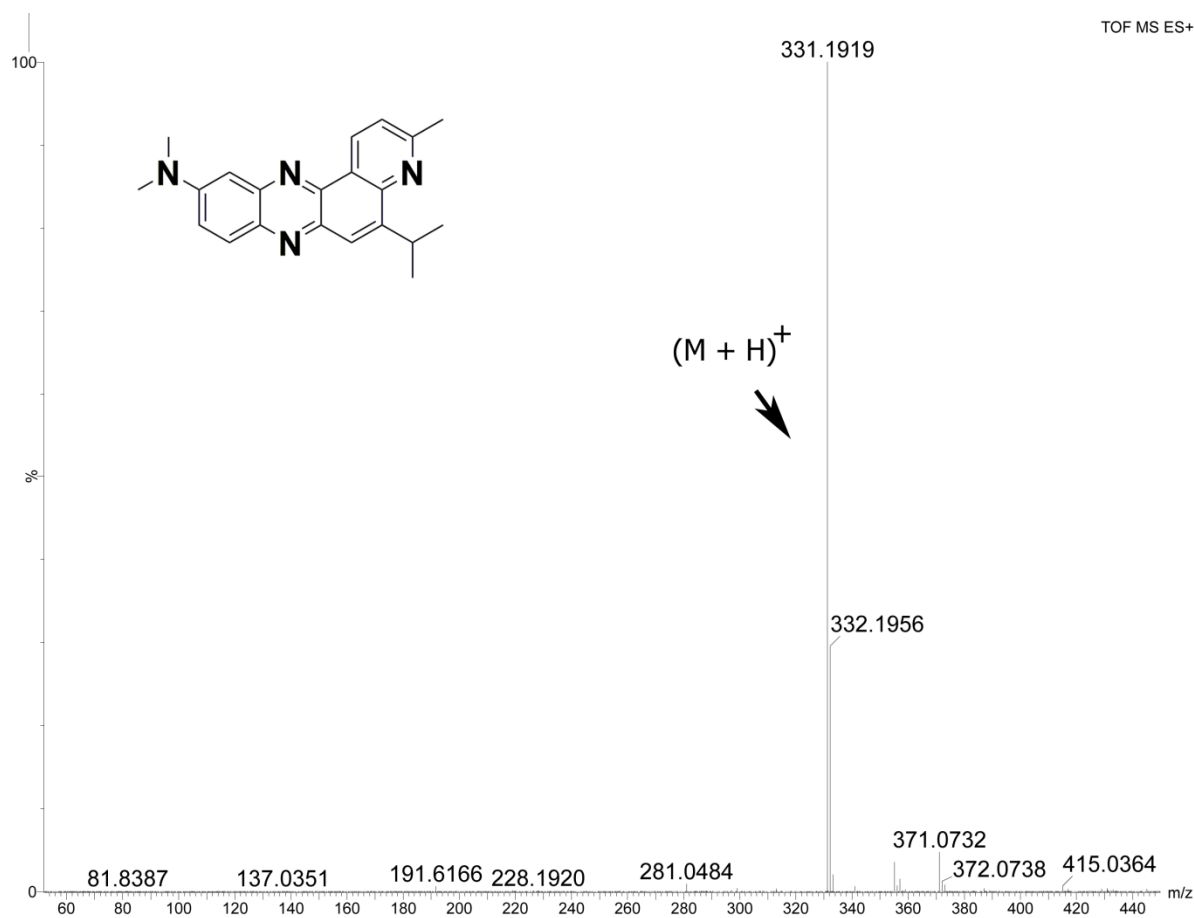

**Figure S14c.** MS spectrum of the molecule **6a**.

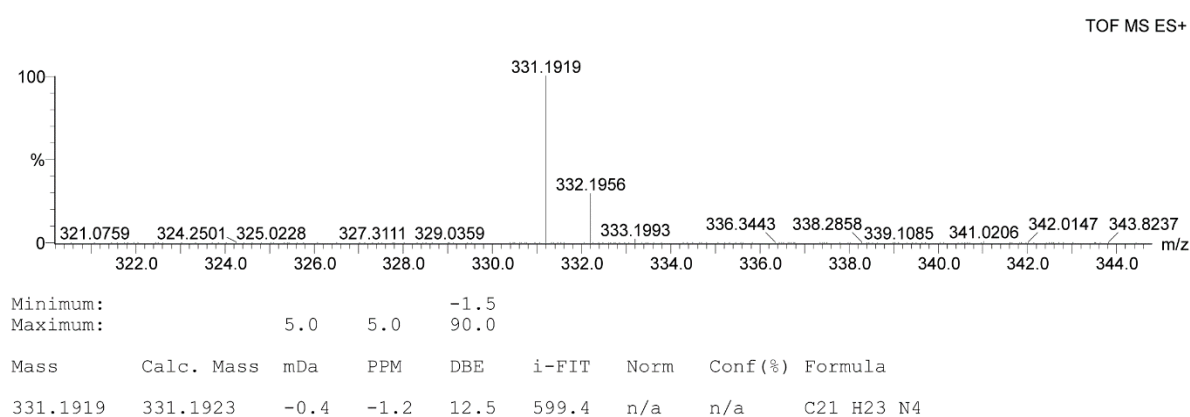

**Figure S14d.** HRMS spectrum of the molecule **6a**.

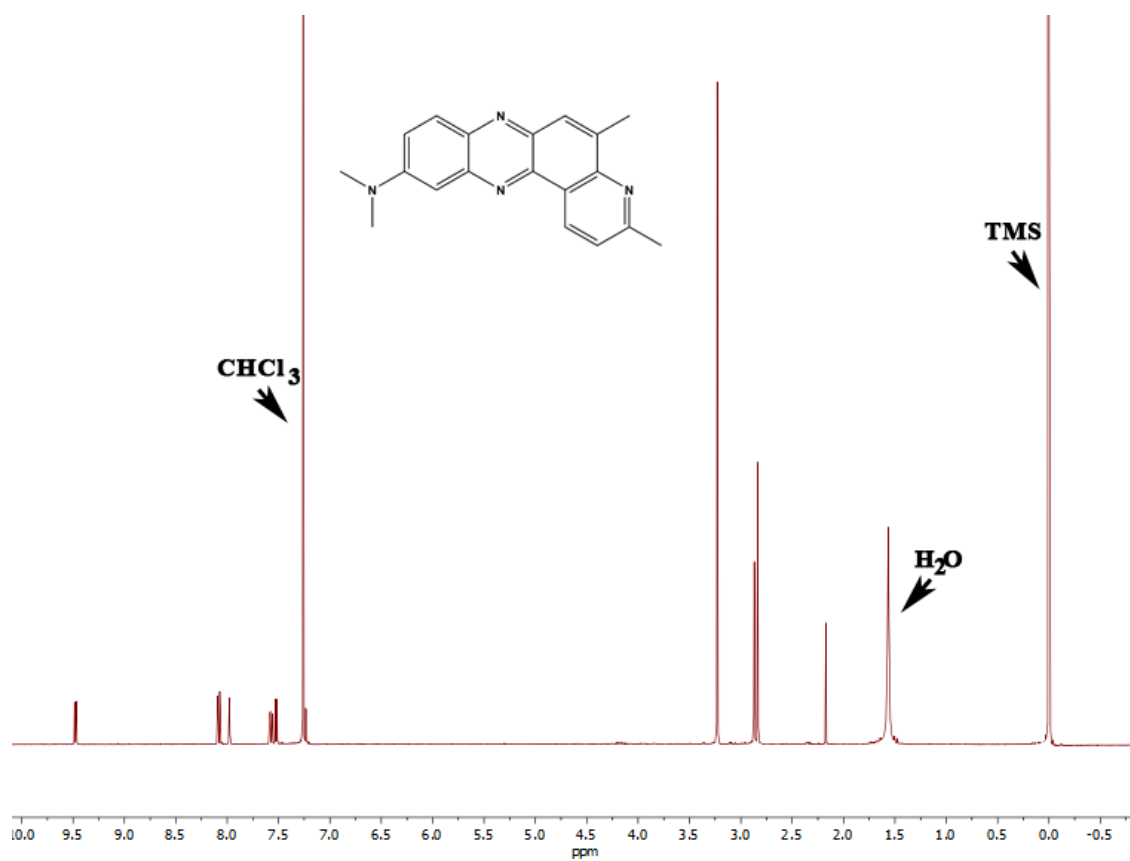

**Figure S15a.**  $^1\text{H}$ -NMR ( $\text{CDCl}_3$ ; 500.2 MHz) spectrum of the **6b**.

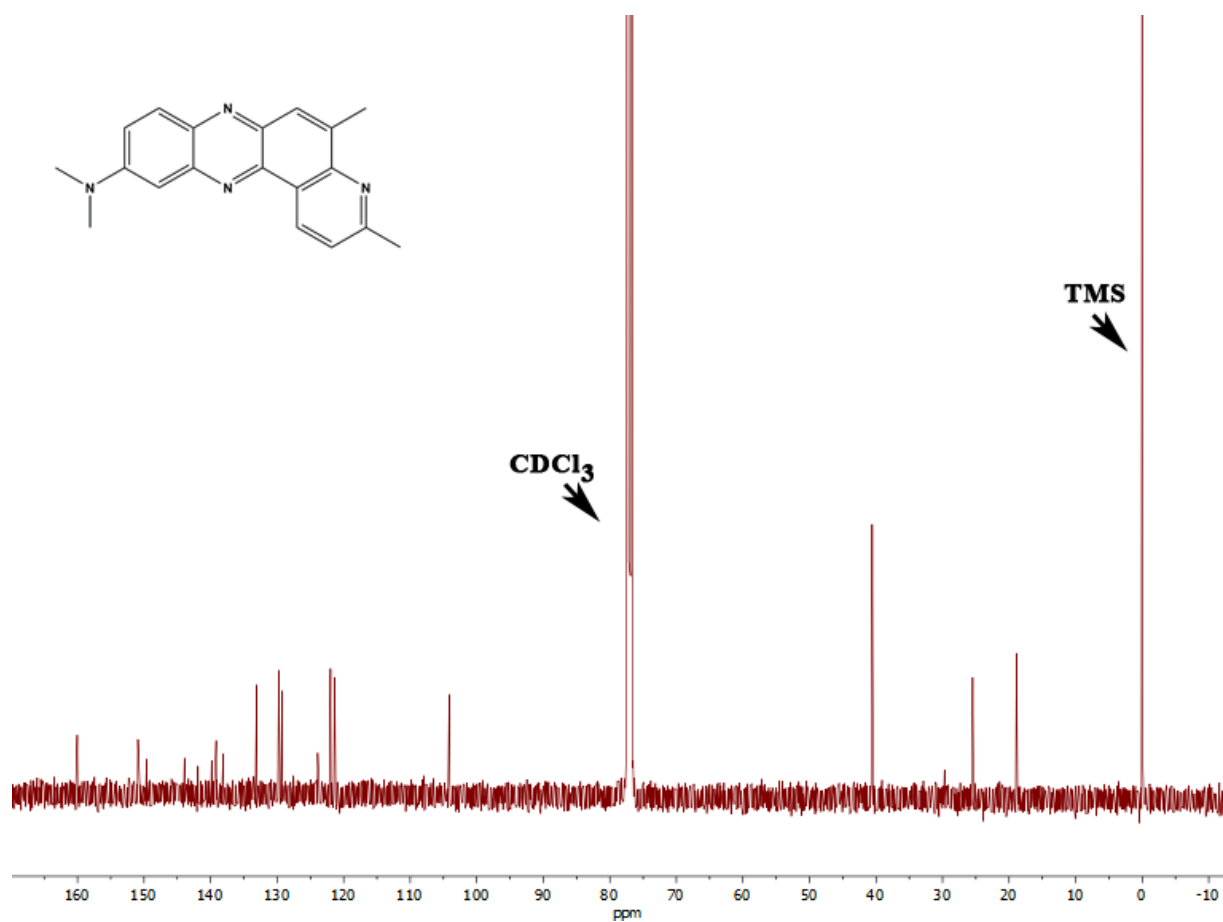

**Figure S15b.**  $^{13}\text{C}\{^1\text{H}\}$ -NMR (CDCl<sub>3</sub>; 125.8 MHz) spectrum of the **6b**.

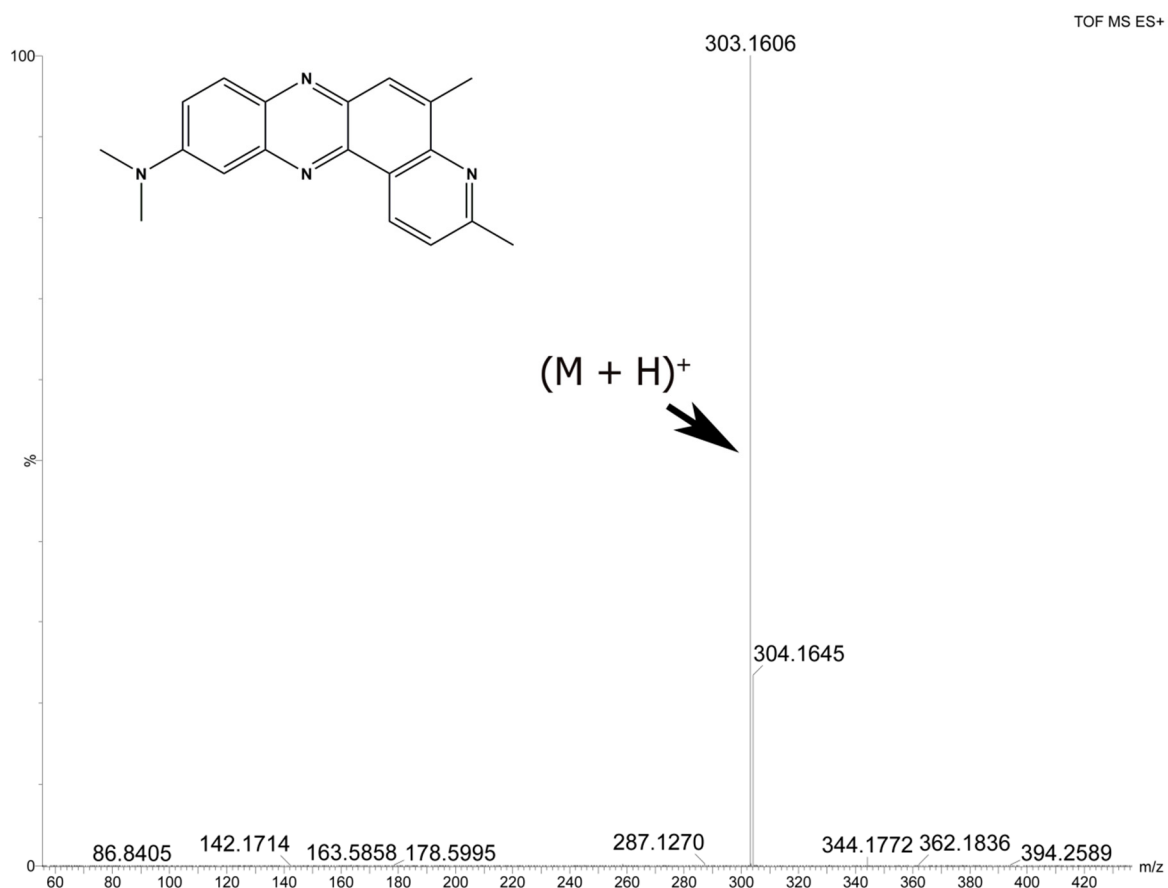

**Figure S15c.** MS spectrum of the molecule **6b**.

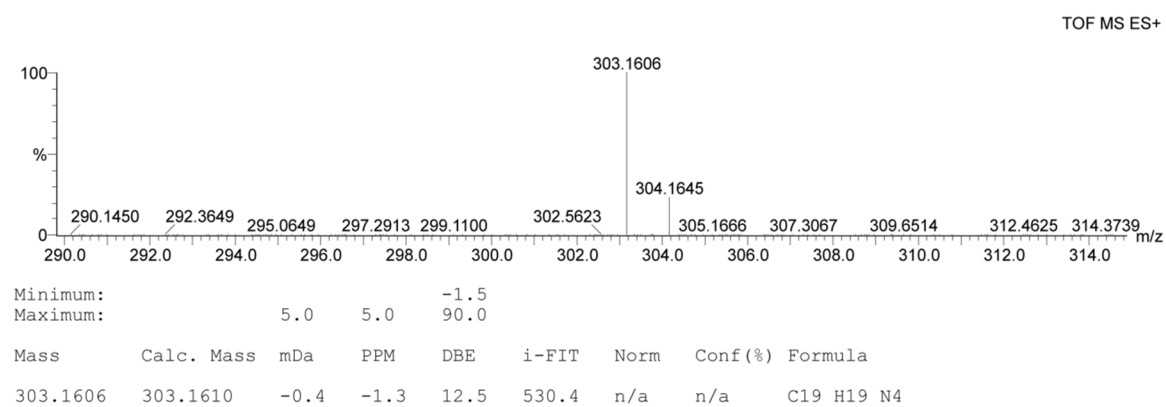

**Figure S15d.** HRMS spectrum of the molecule **6b**.

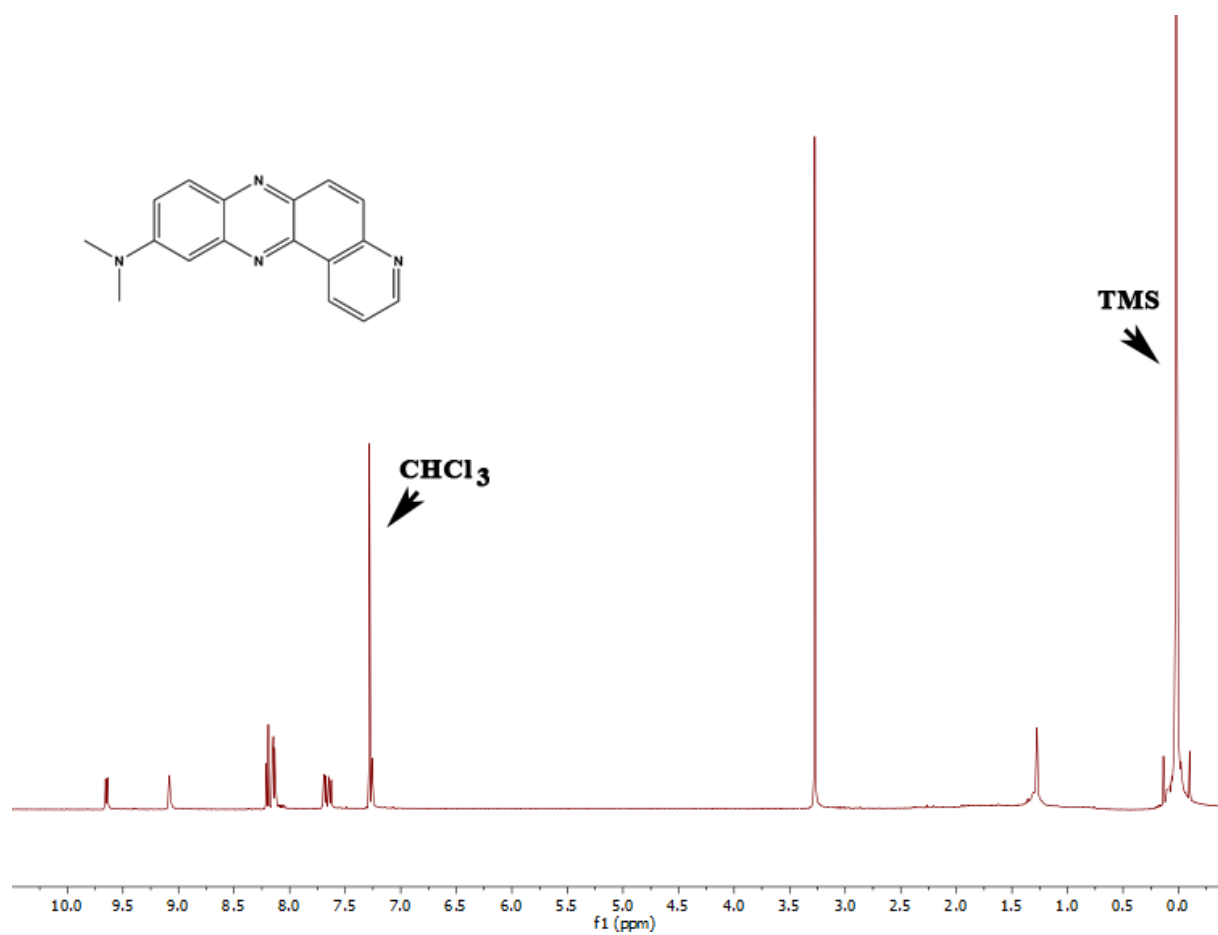

**Figure S16a.** <sup>1</sup>H-NMR (CDCl<sub>3</sub>; 500.2 MHz) spectrum of the **6c**.

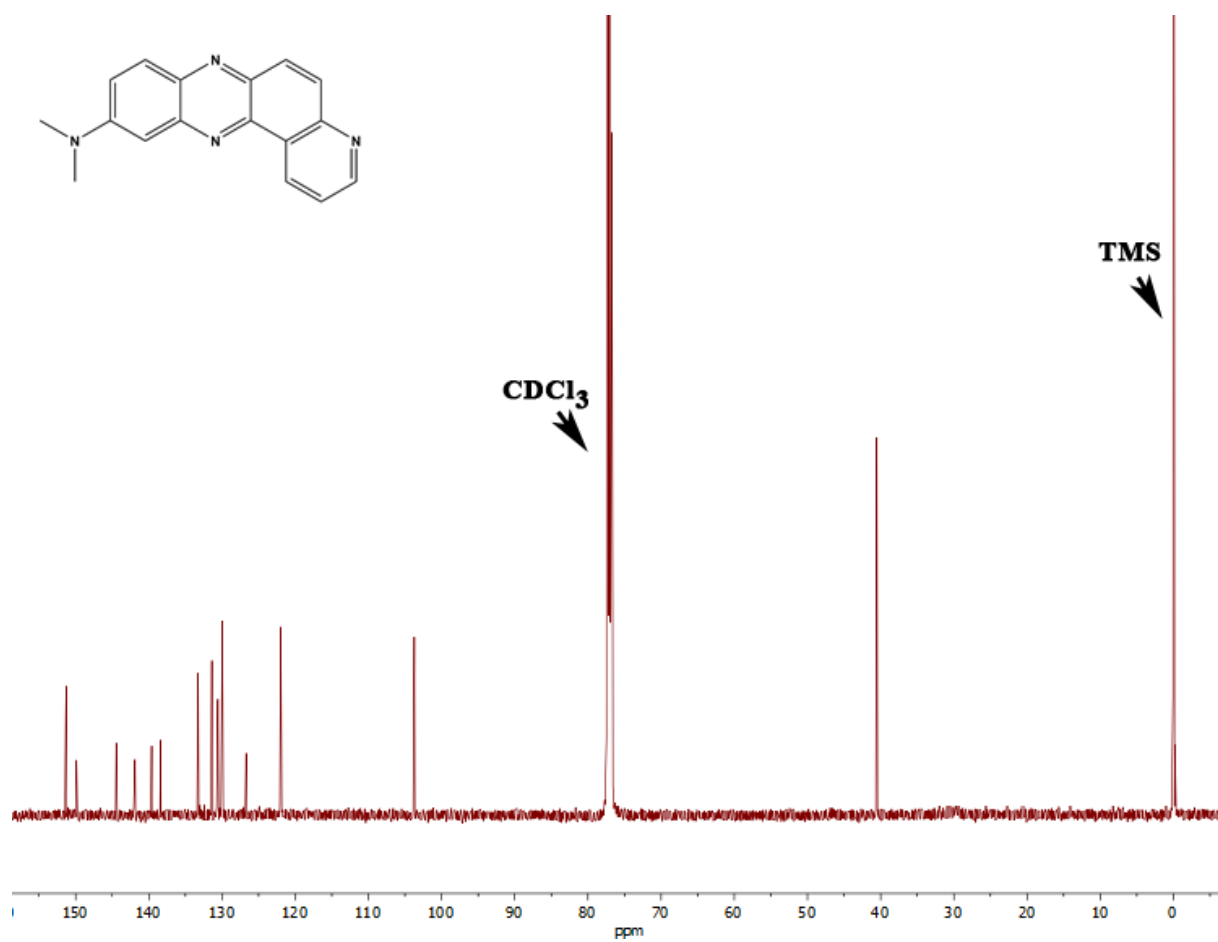

**Figure S16b.**  $^{13}\text{C}\{^1\text{H}\}$ -NMR (CDCl<sub>3</sub>; 125.8 MHz) spectrum of the **6c**.



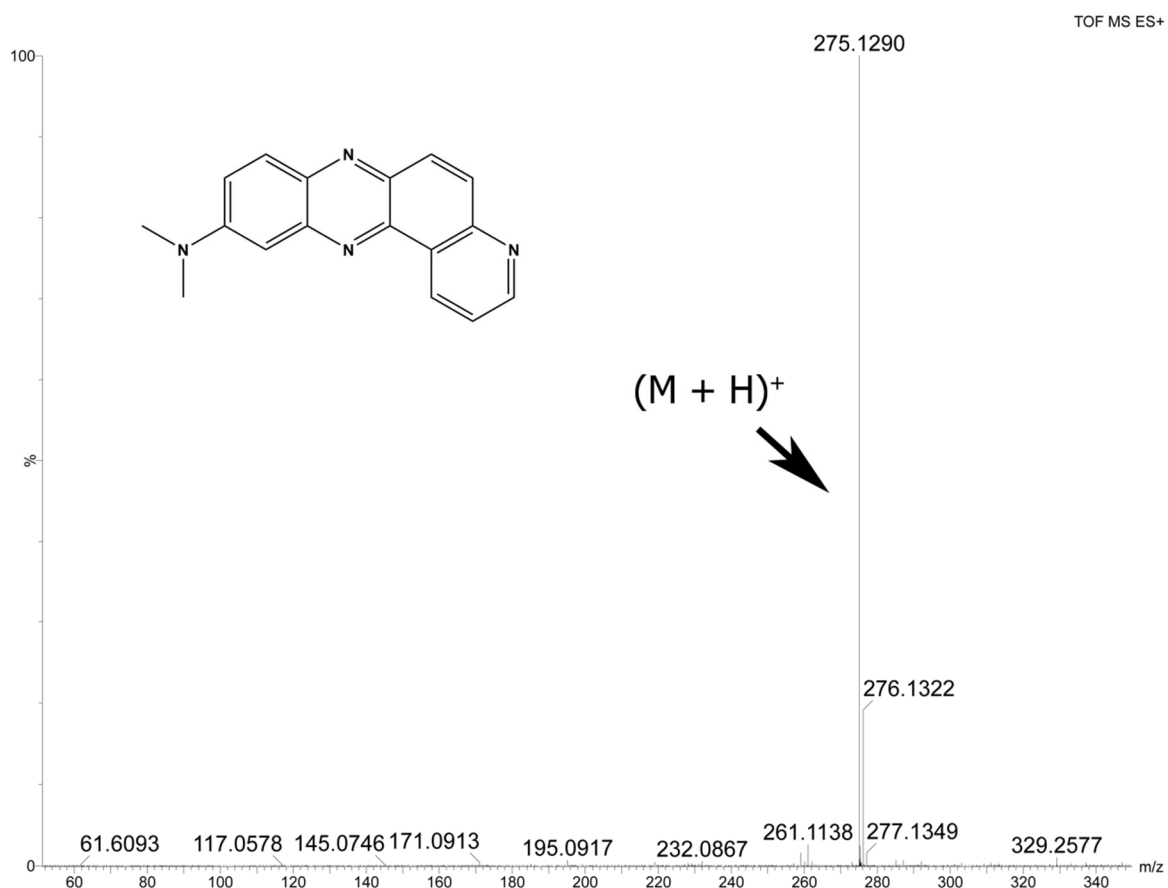

**Figure S16c.** MS spectrum of the molecule **6c**.

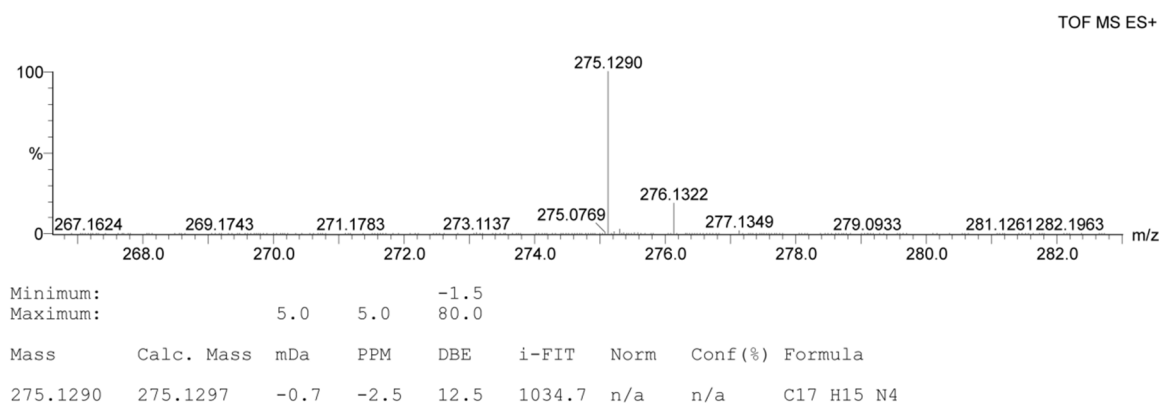

**Figure S16d.** HRMS spectrum of the molecule **6c**.

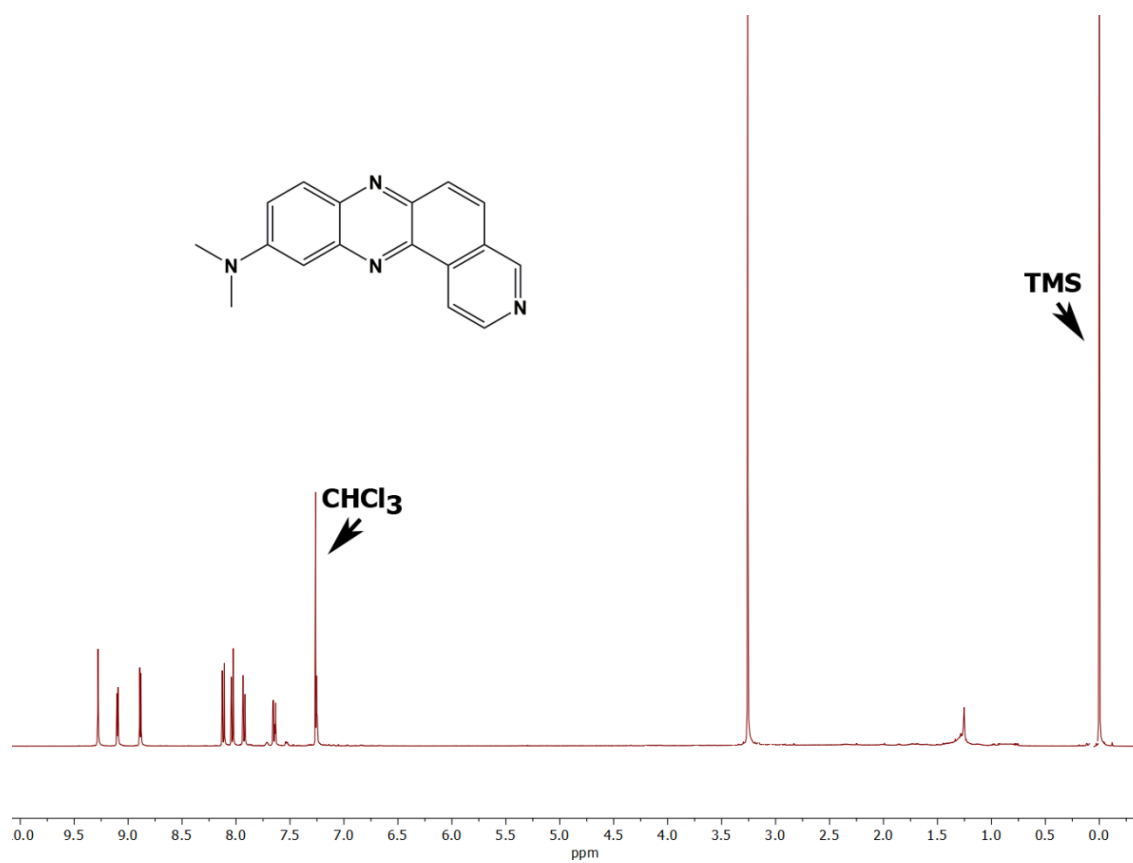

**Figure S17a.** <sup>1</sup>H-NMR (CDCl<sub>3</sub>; 500.2 MHz) spectrum of the **6d**.

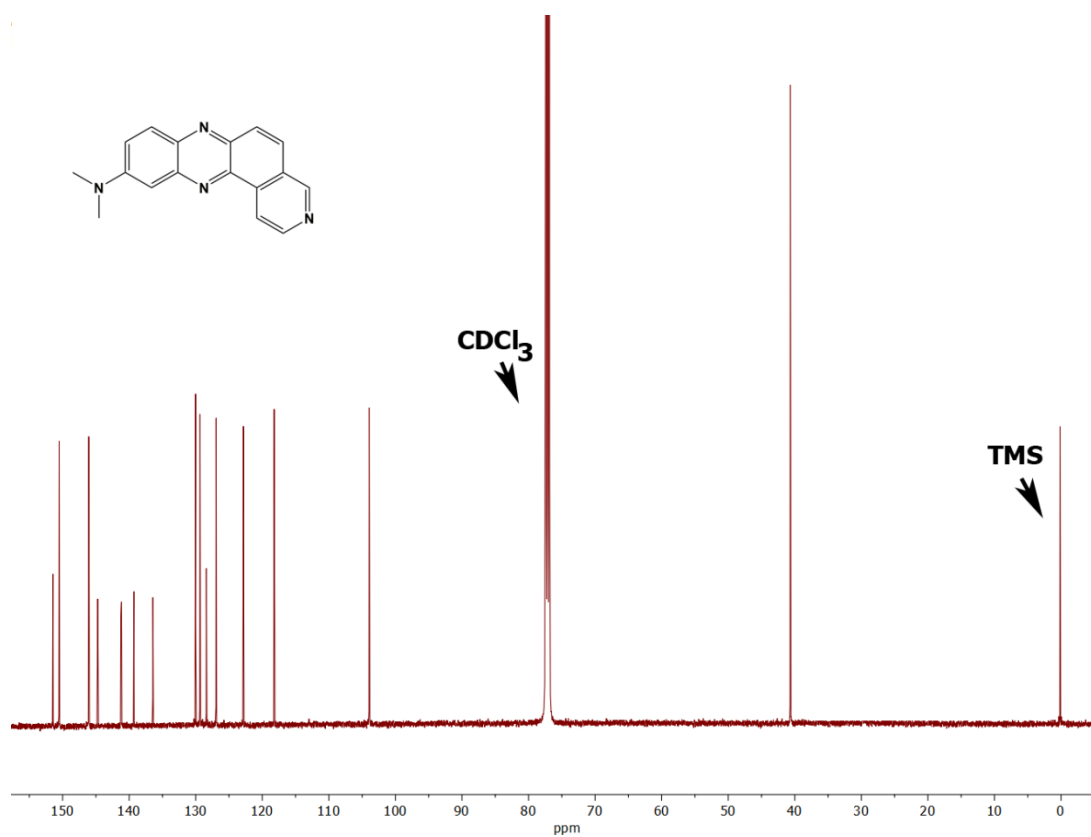

**Figure S17b.** <sup>13</sup>C{<sup>1</sup>H}-NMR (CDCl<sub>3</sub>; 125.8 MHz) spectrum of the **6d**.

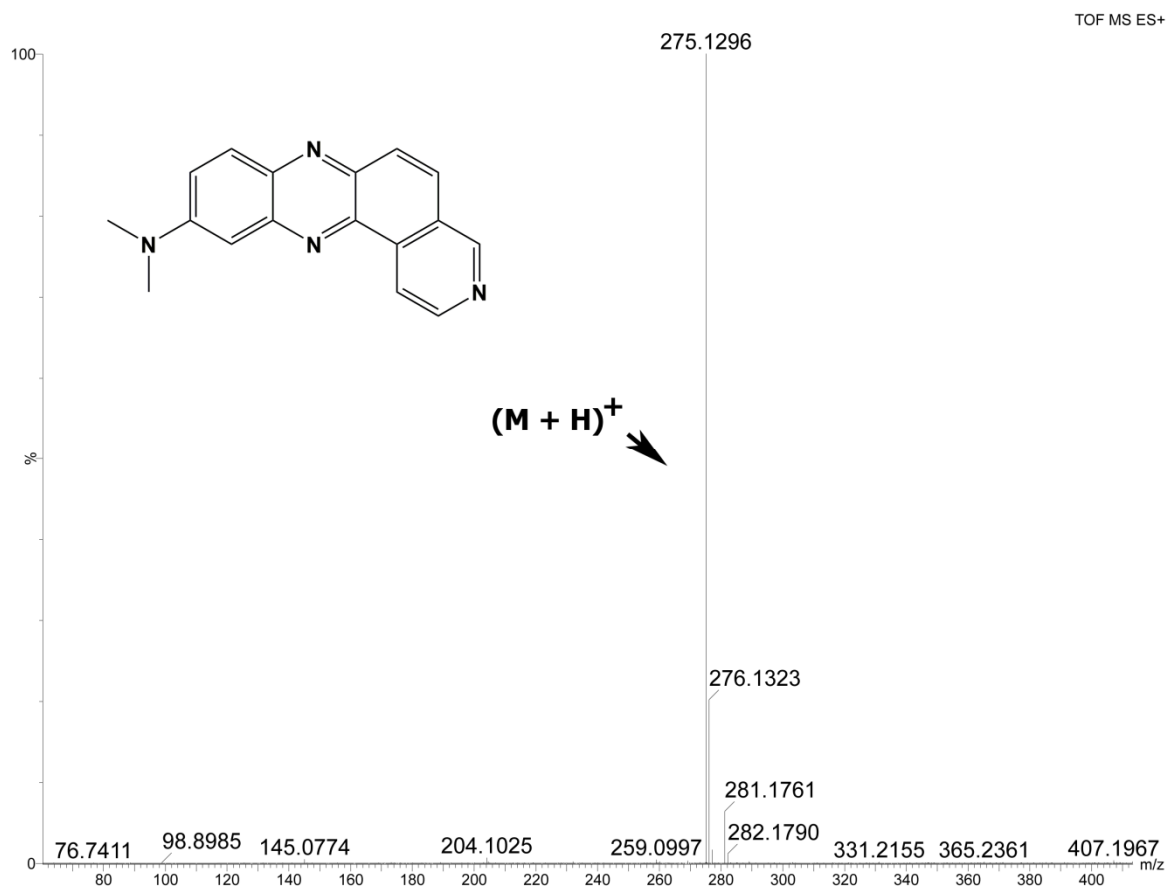

**Figure S17c.** MS spectrum of the molecule **6d**.

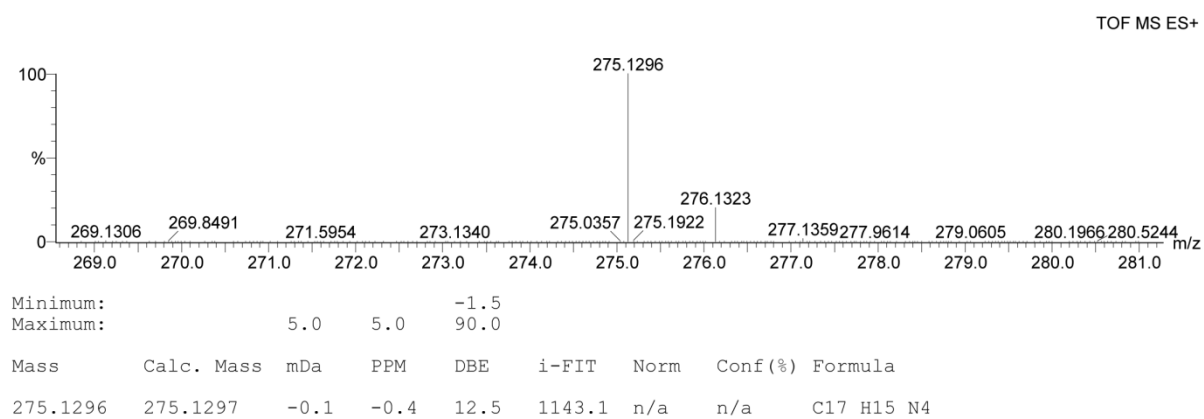

**Figure S17d.** HRMS spectrum of the molecule **6d**.

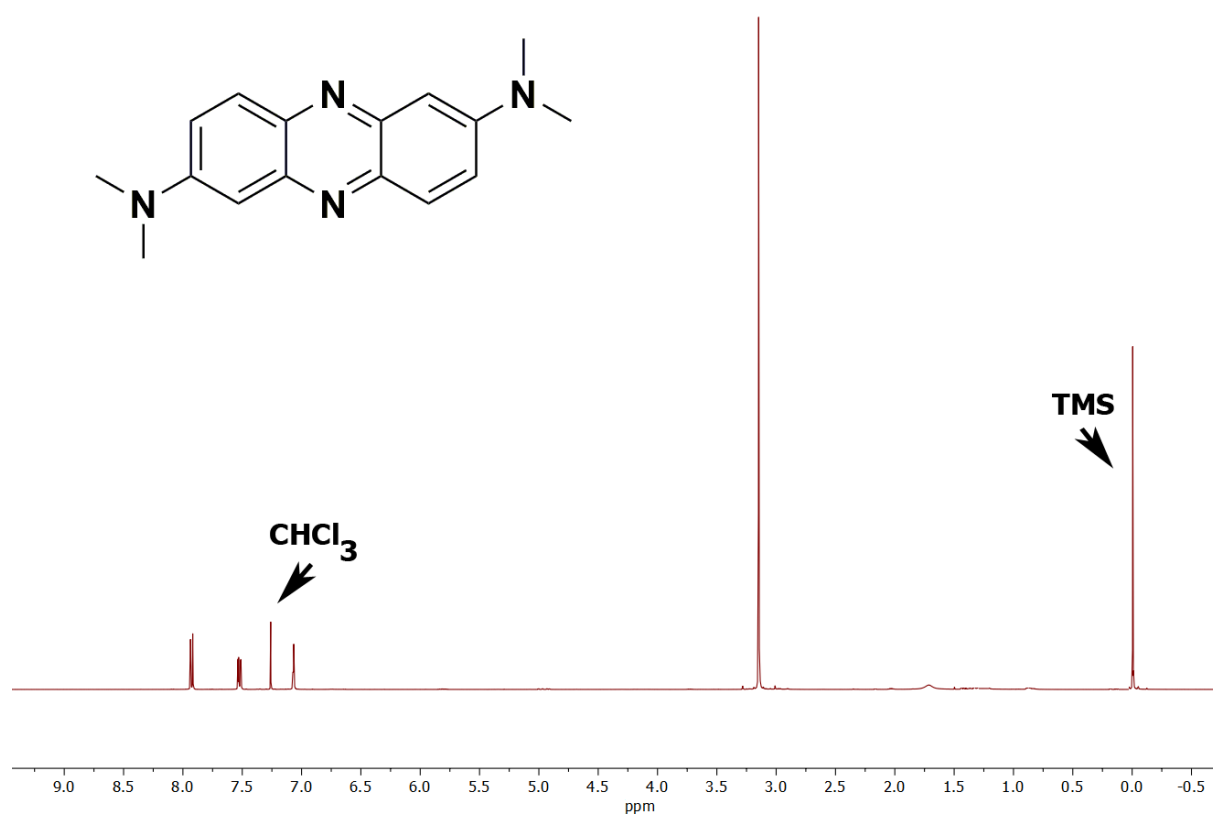

**Figure S18a.** <sup>1</sup>H-NMR (CDCl<sub>3</sub>; 500.2 MHz) spectrum of the **6e**.

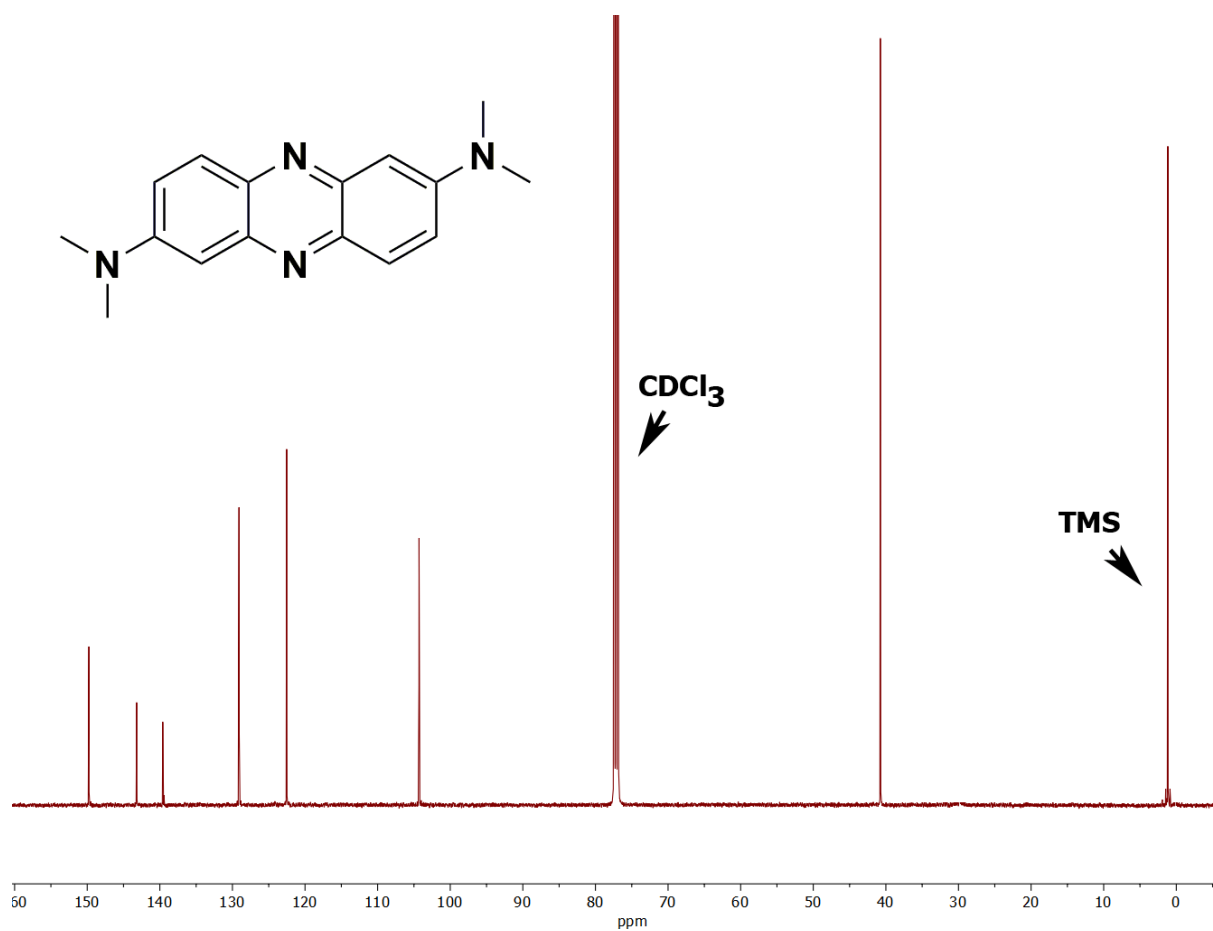

**Figure S18b.** <sup>13</sup>C{<sup>1</sup>H}-NMR (CDCl<sub>3</sub>; 125.8 MHz) spectrum of the **6e**.

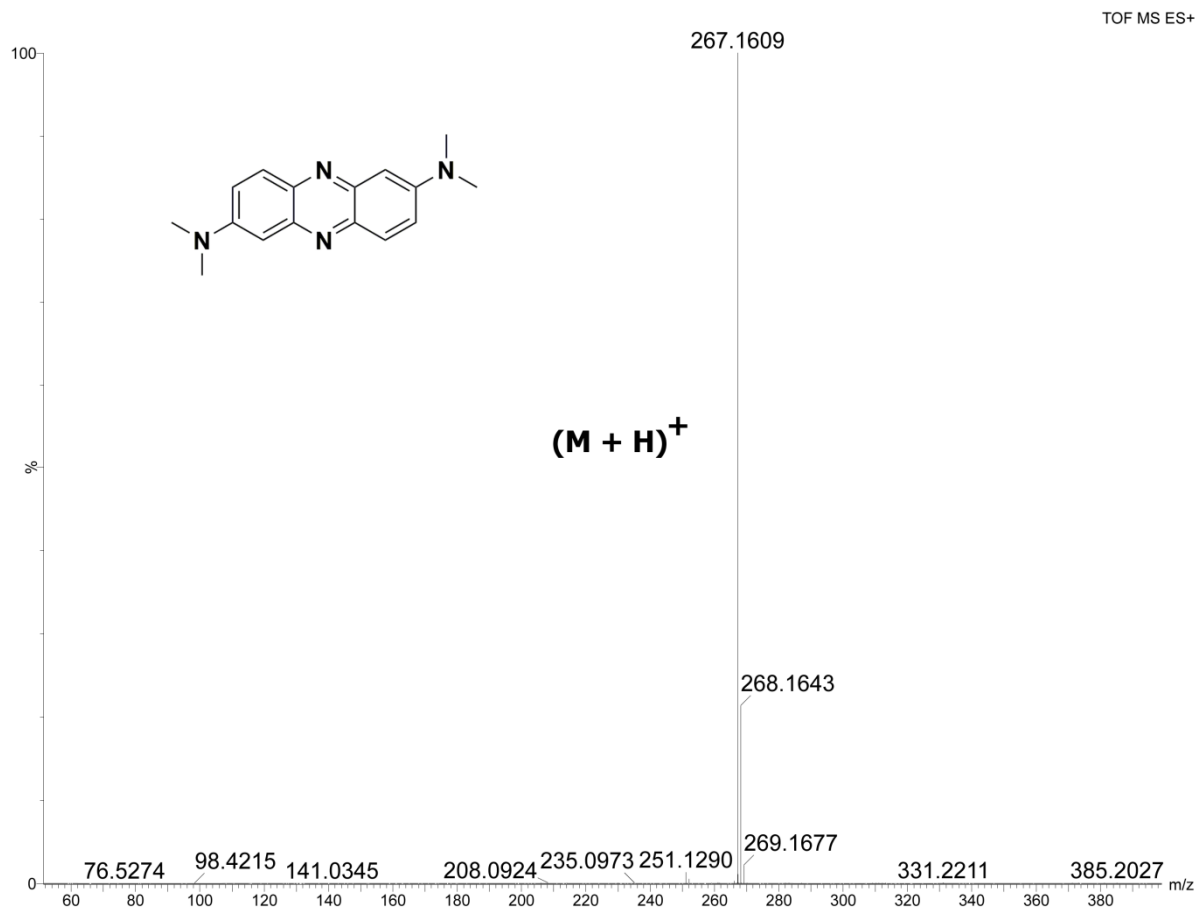

**Figure S18c.** MS spectrum of the molecule **6e**.

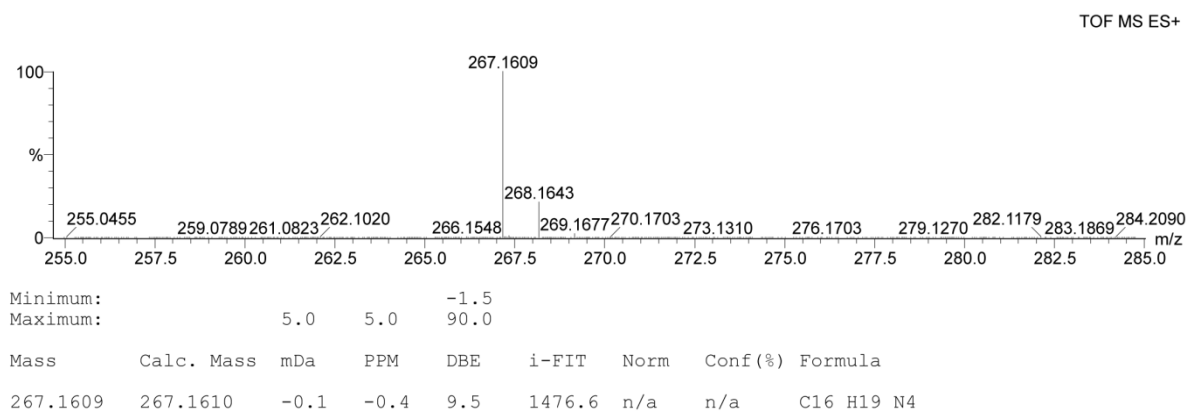

**Figure S18d.** HRMS spectrum of the molecule **6e**.

**Table S1.** Wavelengths ( $\lambda$ ), oscillator strengths ( $f$ ) and orbital assignment of the selected electronic transitions in the absorption spectra of molecules **2a** and **3** calculated at the TDDFT/B3LYP/6-31G(d,p) level of theory

| Compounds | Transition               | $\lambda$ , nm | $f$    | Assignment                                                                                                                                                                                                           |
|-----------|--------------------------|----------------|--------|----------------------------------------------------------------------------------------------------------------------------------------------------------------------------------------------------------------------|
| <b>2a</b> | $S_0 \rightarrow T_3$    | 306            | 0      | HOMO $\rightarrow$ LUMO+1 (+85%)<br>HOMO-2 $\rightarrow$ LUMO+2 (7%)                                                                                                                                                 |
|           | $S_0 \rightarrow T_2$    | 350            | 0      | HOMO $\rightarrow$ LUMO+3 (+39%)<br>HOMO-1 $\rightarrow$ LUMO+1 (+19%)<br>HOMO-2 $\rightarrow$ LUMO (13%)<br>HOMO-3 $\rightarrow$ LUMO+2 (8%)<br>HOMO-3 $\rightarrow$ LUMO (7%)<br>HOMO-2 $\rightarrow$ LUMO+2 (+6%) |
|           | $S_0 \rightarrow T_1$    | 358            | 0      | HOMO $\rightarrow$ LUMO (+60%)<br>HOMO-1 $\rightarrow$ LUMO+2 (+12%)<br>HOMO-2 $\rightarrow$ LUMO+3 (12%)<br>HOMO-3 $\rightarrow$ LUMO+1 (10%)                                                                       |
|           | $S_0 \rightarrow S_1$    | 286            | 0.0148 | HOMO $\rightarrow$ LUMO (97%)                                                                                                                                                                                        |
|           | $S_0 \rightarrow S_2$    | 273            | 0.0141 | HOMO $\rightarrow$ LUMO+1 (90%)                                                                                                                                                                                      |
|           | $S_0 \rightarrow S_3$    | 265            | 0.0401 | HOMO $\rightarrow$ LUMO+2 (85%)<br>HOMO-1 $\rightarrow$ LUMO (12%)                                                                                                                                                   |
|           | $S_0 \rightarrow S_4$    | 250            | 0.0669 | HOMO $\rightarrow$ LUMO+3 (90%)                                                                                                                                                                                      |
|           | $S_0 \rightarrow S_5$    | 239            | 0.2855 | HOMO-1 $\rightarrow$ LUMO (70%)<br>HOMO $\rightarrow$ LUMO+2 (11%)<br>HOMO $\rightarrow$ LUMO+4 (8%)<br>HOMO-2 $\rightarrow$ LUMO+1 (5%)                                                                             |
|           | $S_0 \rightarrow S_6$    | 229            | 0.0218 | HOMO-1 $\rightarrow$ LUMO+1 (88%)                                                                                                                                                                                    |
|           | $S_0 \rightarrow S_7$    | 228            | 0.0244 | HOMO $\rightarrow$ LUMO+4 (86%)<br>HOMO-1 $\rightarrow$ LUMO (5%)                                                                                                                                                    |
|           | $S_0 \rightarrow S_8$    | 223            | 0.0401 | HOMO-1 $\rightarrow$ LUMO+3 (67%)<br>HOMO-2 $\rightarrow$ LUMO+2 (16%)                                                                                                                                               |
|           | $S_0 \rightarrow S_9$    | 220            | 0.0039 | HOMO-1 $\rightarrow$ LUMO+2 (79%)<br>HOMO-2 $\rightarrow$ LUMO+1 (13%)                                                                                                                                               |
|           | $S_0 \rightarrow S_{10}$ | 214            | 0.0067 | HOMO-3 $\rightarrow$ LUMO (38%)<br>HOMO-2 $\rightarrow$ LUMO (26%)<br>HOMO-1 $\rightarrow$ LUMO+3 (16%)<br>HOMO-2 $\rightarrow$ LUMO+2 (10%)<br>HOMO-3 $\rightarrow$ LUMO+2 (8%)                                     |
|           | $S_0 \rightarrow S_{11}$ | 212            | 0.1144 | HOMO-2 $\rightarrow$ LUMO+1 (45%)<br>HOMO-3 $\rightarrow$ LUMO+3 (26%)<br>HOMO-1 $\rightarrow$ LUMO+2 (9%)<br>HOMO-1 $\rightarrow$ LUMO (7%)                                                                         |
|           | $S_0 \rightarrow S_{12}$ | 204            | 0.0549 | HOMO-2 $\rightarrow$ LUMO (42%)<br>HOMO-3 $\rightarrow$ LUMO (30%)<br>HOMO-2 $\rightarrow$ LUMO+2 (12%)<br>HOMO-3 $\rightarrow$ LUMO+2 (10%)                                                                         |
|           | $S_0 \rightarrow S_{13}$ | 203            | 0.0004 | HOMO-2 $\rightarrow$ LUMO+3 (48%)<br>HOMO-3 $\rightarrow$ LUMO+1 (43%)                                                                                                                                               |
|           | $S_0 \rightarrow S_{14}$ | 196            | 0.0027 | HOMO-1 $\rightarrow$ LUMO+4 (84%)<br>HOMO-2 $\rightarrow$ LUMO+3 (9%)                                                                                                                                                |



|          |                          |     |        |                                                                                                                                            |
|----------|--------------------------|-----|--------|--------------------------------------------------------------------------------------------------------------------------------------------|
|          | $S_0 \rightarrow S_{15}$ | 192 | 0.5225 | HOMO-3 $\rightarrow$ LUMO+3 (56%)<br>HOMO-2 $\rightarrow$ LUMO+1 (18%)<br>HOMO-4 $\rightarrow$ LUMO (7%)<br>HOMO-6 $\rightarrow$ LUMO (6%) |
| <b>3</b> | $S_0 \rightarrow S_1$    | 376 | 0.6989 | HOMO $\rightarrow$ LUMO (99%)                                                                                                              |
|          | $S_0 \rightarrow S_2$    | 330 | 0.0227 | HOMO $\rightarrow$ LUMO+1 (96%)                                                                                                            |
|          | $S_0 \rightarrow S_3$    | 318 | 0.0002 | HOMO-4 $\rightarrow$ LUMO (57%)<br>HOMO-5 $\rightarrow$ LUMO+1 (37%)                                                                       |
|          | $S_0 \rightarrow S_4$    | 317 | 0.0010 | HOMO-5 $\rightarrow$ LUMO (58%)<br>HOMO-4 $\rightarrow$ LUMO+1 (36%)                                                                       |
|          | $S_0 \rightarrow S_5$    | 298 | 0.0076 | HOMO $\rightarrow$ LUMO+2 (52%)<br>HOMO-1 $\rightarrow$ LUMO (42%)                                                                         |
|          | $S_0 \rightarrow S_6$    | 284 | 0.0006 | HOMO-7 $\rightarrow$ LUMO+1 (34%)<br>HOMO-6 $\rightarrow$ LUMO (33%)<br>HOMO-10 $\rightarrow$ LUMO (27%)                                   |
|          | $S_0 \rightarrow S_7$    | 283 | 0.0003 | HOMO-7 $\rightarrow$ LUMO (51%)<br>HOMO-10 $\rightarrow$ LUMO+1 (19%)<br>HOMO-6 $\rightarrow$ LUMO+1 (16%)                                 |
|          | $S_0 \rightarrow S_8$    | 281 | 0.0011 | HOMO-2 $\rightarrow$ LUMO (60%)<br>HOMO-1 $\rightarrow$ LUMO+1 (14%)<br>HOMO $\rightarrow$ LUMO+3 (13%)                                    |
|          | $S_0 \rightarrow S_9$    | 272 | 0.1395 | HOMO-1 $\rightarrow$ LUMO (+51%)<br>HOMO $\rightarrow$ LUMO+2 (43%)                                                                        |
|          | $S_0 \rightarrow S_{10}$ | 259 | 0.0611 | HOMO-1 $\rightarrow$ LUMO+1 (+69%)<br>HOMO-2 $\rightarrow$ LUMO (24%)                                                                      |
|          | $S_0 \rightarrow S_{11}$ | 257 | 0.0281 | HOMO-3 $\rightarrow$ LUMO (+78%)<br>HOMO-2 $\rightarrow$ LUMO+1 (15%)                                                                      |
|          | $S_0 \rightarrow S_{12}$ | 256 | 0.0047 | HOMO $\rightarrow$ LUMO+3 (+78%)<br>HOMO-1 $\rightarrow$ LUMO+1 (+14%)<br>HOMO-2 $\rightarrow$ LUMO (+5%)                                  |
|          | $S_0 \rightarrow S_{13}$ | 250 | 0.0206 | HOMO-2 $\rightarrow$ LUMO+1 (+79%)<br>HOMO-3 $\rightarrow$ LUMO (+17%)                                                                     |
|          | $S_0 \rightarrow S_{14}$ | 244 | 0.0009 | HOMO-6 $\rightarrow$ LUMO (+50%)<br>HOMO-10 $\rightarrow$ LUMO (+34%)<br>HOMO-4 $\rightarrow$ LUMO (7%)                                    |
|          | $S_0 \rightarrow S_{15}$ | 240 | 0.1145 | HOMO-3 $\rightarrow$ LUMO+1 (+97%)                                                                                                         |

All of the transitions are of the  $X^1A \rightarrow n^1A$  symmetry. The solvent effects on the vertical absorption spectrum of **2a** and **3** were included using the polarized-continuum model (PCM), taking the acetonitrile (MeCN) for **2a** and dimethylsulfoxide for **3** as model solvents.

**Table S2.** Spectroscopic data of the  $S_1-S_0$  electronic transition in the emission spectra of the studied compounds calculated at the B3LYP/6-31G(d,p) level of theory

| Compound  | Transition | $\lambda_{em}, \text{nm}$ | $f$    |
|-----------|------------|---------------------------|--------|
| <b>2a</b> | $S_1-S_0$  | 386                       | 0.0013 |
| <b>3</b>  | $S_1-S_0$  | 568                       | 0.0201 |

**Table S3.** Crystal data and structure refinement details of compounds **1**, **2a**, **2b**, **3**, **5** and **6a**.

|                                            | <b>1</b>                                                        | <b>2a</b>                                          | <b>2b</b>                                        | <b>3</b>                                                        | <b>5</b>                                       | <b>6a</b>                                      |
|--------------------------------------------|-----------------------------------------------------------------|----------------------------------------------------|--------------------------------------------------|-----------------------------------------------------------------|------------------------------------------------|------------------------------------------------|
| Empirical formula                          | C <sub>21</sub> H <sub>13</sub> N <sub>3</sub> O <sub>3</sub> S | C <sub>17</sub> H <sub>18</sub> NO <sub>3</sub> PS | C <sub>5</sub> H <sub>11</sub> O <sub>3</sub> PS | C <sub>13</sub> H <sub>11</sub> N <sub>3</sub> O <sub>6</sub> S | C <sub>26</sub> H <sub>26</sub> N <sub>4</sub> | C <sub>21</sub> H <sub>22</sub> N <sub>4</sub> |
| Temperature (K)                            | 292                                                             | 294                                                | 294                                              | 100                                                             | 294                                            | 100                                            |
| Wavelength (Å)                             | 0.71073                                                         | 1.54184                                            | 0.71073                                          | 0.71073                                                         | 0.71073                                        | 0.71073                                        |
| Crystal system                             | Monoclinic                                                      | Monoclinic                                         | Orthorhombic                                     | Monoclinic                                                      | Tetragonal                                     | Triclinic                                      |
| Space group                                | <i>P</i> 2 <sub>1</sub> / <i>n</i>                              | <i>P</i> 2 <sub>1</sub> / <i>n</i>                 | <i>Pbca</i>                                      | <i>P</i> 2 <sub>1</sub> / <i>n</i>                              | <i>P</i> 4 <sub>2</sub> / <i>n</i>             | <i>P</i> -1                                    |
| Unit cell dimensions                       |                                                                 |                                                    |                                                  |                                                                 |                                                |                                                |
| a (Å)                                      | 12.7017(6)                                                      | 8.8248(3)                                          | 11.1587(17)                                      | 8.2753(3)                                                       | 21.1688(8)                                     | 9.0731(6)                                      |
| b (Å)                                      | 8.8798(4)                                                       | 16.5758(4)                                         | 11.8846(13)                                      | 19.9331(7)                                                      | 21.1688(8)                                     | 9.3169(7)                                      |
| c (Å)                                      | 15.0016(6)                                                      | 11.8216(4)                                         | 13.1114(16)                                      | 8.5875(3)                                                       | 4.6776(3)                                      | 11.5962(8)                                     |
| α (°)                                      | 90                                                              | 90                                                 | 90                                               | 90                                                              | 90                                             | 91.441(6)                                      |
| β (°)                                      | 103.353(5)                                                      | 103.951(3)                                         | 90                                               | 99.197(3)                                                       | 90                                             | 104.105(5)                                     |
| γ (°)                                      | 90                                                              | 90                                                 | 90                                               | 90                                                              | 90                                             | 116.266(7)                                     |
| Volume (Å <sup>3</sup> )                   | 1646.27(13)                                                     | 1678.23(9)                                         | 1738.8(4)                                        | 1398.32(9)                                                      | 2096.1(2)                                      | 842.52(11)                                     |
| Z                                          | 4                                                               | 4                                                  | 8                                                | 4                                                               | 4                                              | 2                                              |
| Calculated density(g/cm <sup>3</sup> )     | 1.434                                                           | 1.375                                              | 1.392                                            | 1.602                                                           | 1.250                                          | 1.302                                          |
| Absorption coefficient (mm <sup>-1</sup> ) | 0.212                                                           | 2.735                                              | 0.508                                            | 0.270                                                           | 0.075                                          | 0.079                                          |
| F(000)                                     | 736                                                             | 728                                                | 768                                              | 696                                                             | 840                                            | 352                                            |
| Crystal dimensions (mm)                    | 0.28 x 0.09 x 0.08                                              | 0.53 x 0.11 x 0.08                                 | 0.41 x 0.07 x 0.05                               | 0.64 x 0.08 x 0.08                                              | 0.42 x 0.04 x 0.04                             | 0.53 x 0.15 x 0.05                             |
| θ range for data collection (°)            | 3.297 to 26.372                                                 | 4.687 to 73.641                                    | 3.428 to 26.368                                  | 3.155 to 26.364                                                 | 3.043 to 26.347                                | 3.291 to 26.369                                |
| Index ranges                               | -11 ≤ <i>h</i> ≤ 15                                             | -8 ≤ <i>h</i> ≤ 10                                 | -10 ≤ <i>h</i> ≤ 13                              | -10 ≤ <i>h</i> ≤ 10                                             | -26 ≤ <i>h</i> ≤ 26                            | -11 ≤ <i>h</i> ≤ 11                            |
|                                            | -11 ≤ <i>k</i> ≤ 11                                             | -20 ≤ <i>k</i> ≤ 20                                | -14 ≤ <i>k</i> ≤ 12                              | -24 ≤ <i>k</i> ≤ 24                                             | -60 ≤ <i>k</i> ≤ 24                            | -8 ≤ <i>k</i> ≤ 11                             |
|                                            | -18 ≤ <i>l</i> ≤ 18                                             | -14 ≤ <i>l</i> ≤ 14                                | -16 ≤ <i>l</i> ≤ 15                              | -9 ≤ <i>l</i> ≤ 10                                              | -5 ≤ <i>l</i> ≤ 5                              | -14 ≤ <i>l</i> ≤ 14                            |
| Reflections collected                      | 13281                                                           | 11350                                              | 8570                                             | 11655                                                           | 16533                                          | 7141                                           |
| Independent reflections                    | 3354                                                            | 3338                                               | 1772                                             | 2859                                                            | 2137                                           | 3450                                           |
| Data / restraints / parameters             | 3354 / 0 / 235                                                  | 3338 / 0 / 211                                     | 1772 / 2 / 106                                   | 2859 / 5 / 227                                                  | 2137 / 0 / 139                                 | 3450 / 0 / 231                                 |
| Goodness-of-fit on F <sup>2</sup>          | 1.032                                                           | 1.059                                              | 1.000                                            | 1.110                                                           | 1.042                                          | 1.022                                          |
| Final R indices (I>2σ(I))                  | 0.0353; 0.0933                                                  | 0.0462; 0.1268                                     | 0.0591; 0.1458                                   | 0.0602; 0.1847                                                  | 0.0555; 0.1476                                 | 0.0468; 0.1091                                 |
| R indices (all data)                       | 0.0452; 0.1022                                                  | 0.0520; 0.1348                                     | 0.1116; 0.1812                                   | 0.0692; 0.1930                                                  | 0.0878; 0.1757                                 | 0.0726; 0.1290                                 |
| Largest diff. peak and hole                | 0.197 and -0.191                                                | 0.278 and -0.370                                   | 0.322 and -0.281                                 | 1.233 and -0.551                                                | 0.198 and -0.158                               | 0.217 and -0.304                               |
| CCDC number                                | 2177507                                                         | 2177508                                            | 2178722                                          | 2177509                                                         | 2177510                                        | 2177511                                        |

**Table S4.** Geometric parameters (Å, °) for **1**

|          |             |          |           |
|----------|-------------|----------|-----------|
| S11—C11A | 1.7452 (16) | C4A—C12A | 1.402 (2) |
| S11—C10A | 1.7494 (17) | C5A—C11A | 1.421 (2) |
| O1—C13   | 1.1991 (18) | C6A—C7   | 1.376 (2) |
| N5—C5A   | 1.2905 (19) | C6A—C10A | 1.384 (2) |
| N5—C4A   | 1.3612 (18) | C7—C8    | 1.373 (2) |

|               |             |              |             |
|---------------|-------------|--------------|-------------|
| N6—C13        | 1.3935 (18) | C8—C9        | 1.366 (3)   |
| N6—C5A        | 1.4028 (18) | C9—C10       | 1.364 (3)   |
| N6—C6A        | 1.4236 (18) | C10—C10A     | 1.377 (2)   |
| N12—C11A      | 1.2947 (19) | C13—C14      | 1.480 (2)   |
| N12—C12A      | 1.361 (2)   | C14—C19      | 1.377 (2)   |
| C1—C2         | 1.351 (3)   | C14—C15      | 1.379 (2)   |
| C1—C12A       | 1.401 (2)   | C15—C16      | 1.374 (3)   |
| C2—C3         | 1.384 (3)   | C16—C17      | 1.360 (3)   |
| C3—C4         | 1.355 (2)   | C17—C18      | 1.368 (3)   |
| C4—C4A        | 1.394 (2)   | C18—C19      | 1.373 (2)   |
|               |             |              |             |
| C11A—S11—C10A | 97.81 (7)   | C9—C10—C10A  | 119.71 (16) |
| C5A—N5—C4A    | 116.57 (12) | C10—C10A—C6A | 120.15 (16) |
| C13—N6—C5A    | 122.14 (12) | C10—C10A—S11 | 119.46 (13) |
| C13—N6—C6A    | 121.67 (12) | C6A—C10A—S11 | 120.38 (12) |
| C5A—N6—C6A    | 116.07 (11) | N12—C11A—C5A | 122.25 (14) |
| C11A—N12—C12A | 116.35 (13) | N12—C11A—S11 | 118.72 (11) |
| C2—C1—C12A    | 119.65 (17) | C5A—C11A—S11 | 118.98 (11) |
| C1—C2—C3      | 121.04 (16) | N12—C12A—C1  | 119.55 (15) |
| C4—C3—C2      | 120.92 (18) | N12—C12A—C4A | 121.36 (13) |
| C3—C4—C4A     | 119.44 (17) | C1—C12A—C4A  | 119.10 (15) |
| N5—C4A—C4     | 119.38 (14) | O1—C13—N6    | 121.17 (15) |
| N5—C4A—C12A   | 120.77 (14) | O1—C13—C14   | 121.96 (14) |
| C4—C4A—C12A   | 119.84 (14) | N6—C13—C14   | 116.78 (13) |
| N5—C5A—N6     | 119.03 (12) | C19—C14—C15  | 119.54 (16) |
| N5—C5A—C11A   | 122.63 (13) | C19—C14—C13  | 121.63 (14) |
| N6—C5A—C11A   | 118.34 (13) | C15—C14—C13  | 118.61 (16) |
| C7—C6A—C10A   | 119.54 (14) | C16—C15—C14  | 119.53 (19) |
| C7—C6A—N6     | 122.49 (13) | C17—C16—C15  | 120.57 (18) |
| C10A—C6A—N6   | 117.92 (13) | C16—C17—C18  | 120.27 (19) |
| C8—C7—C6A     | 119.63 (16) | C17—C18—C19  | 119.8 (2)   |
| C9—C8—C7      | 120.59 (17) | C18—C19—C14  | 120.28 (17) |
| C10—C9—C8     | 120.36 (17) |              |             |

**Table S5. Geometric parameters (Å, °) for 2a**

|        |             |         |           |
|--------|-------------|---------|-----------|
| P1—O3  | 1.4523 (17) | C4A—C9A | 1.391 (3) |
| P1—O1  | 1.5695 (14) | C4A—N10 | 1.430 (2) |
| P1—O2  | 1.5705 (15) | C5—C10A | 1.387 (3) |
| P1—N10 | 1.6697 (15) | C5—C6   | 1.395 (3) |

|             |             |              |             |
|-------------|-------------|--------------|-------------|
| S9—C8A      | 1.764 (3)   | C6—C7        | 1.368 (5)   |
| S9—C9A      | 1.764 (3)   | C7—C8        | 1.377 (4)   |
| O1—C11      | 1.451 (3)   | C8—C8A       | 1.391 (3)   |
| O2—C13      | 1.452 (3)   | C8A—C10A     | 1.388 (3)   |
| C1—C2       | 1.373 (4)   | N10—C10A     | 1.433 (2)   |
| C1—C9A      | 1.390 (3)   | C11—C12      | 1.521 (3)   |
| C2—C3       | 1.362 (4)   | C12—C14      | 1.521 (3)   |
| C3—C4       | 1.388 (3)   | C12—C13      | 1.525 (3)   |
| C4—C4A      | 1.389 (3)   | C12—C15      | 1.529 (3)   |
|             |             |              |             |
| O3—P1—O1    | 112.36 (10) | C10A—C8A—C8  | 120.0 (2)   |
| O3—P1—O2    | 112.66 (10) | C10A—C8A—S9  | 118.61 (16) |
| O1—P1—O2    | 106.36 (8)  | C8—C8A—S9    | 121.4 (2)   |
| O3—P1—N10   | 117.01 (10) | C1—C9A—C4A   | 119.6 (2)   |
| O1—P1—N10   | 103.66 (7)  | C1—C9A—S9    | 122.1 (2)   |
| O2—P1—N10   | 103.75 (8)  | C4A—C9A—S9   | 118.23 (16) |
| C8A—S9—C9A  | 97.89 (10)  | C4A—N10—C10A | 115.59 (14) |
| C11—O1—P1   | 118.43 (11) | C4A—N10—P1   | 122.18 (12) |
| C13—O2—P1   | 117.54 (12) | C10A—N10—P1  | 120.66 (12) |
| C2—C1—C9A   | 120.2 (3)   | C5—C10A—C8A  | 119.79 (19) |
| C3—C2—C1    | 120.5 (2)   | C5—C10A—N10  | 121.93 (18) |
| C2—C3—C4    | 120.4 (3)   | C8A—C10A—N10 | 118.22 (18) |
| C3—C4—C4A   | 119.9 (2)   | O1—C11—C12   | 112.17 (15) |
| C4—C4A—C9A  | 119.38 (19) | C11—C12—C14  | 108.24 (19) |
| C4—C4A—N10  | 122.00 (18) | C11—C12—C13  | 108.12 (16) |
| C9A—C4A—N10 | 118.57 (18) | C14—C12—C13  | 109.10 (18) |
| C10A—C5—C6  | 119.3 (2)   | C11—C12—C15  | 110.45 (16) |
| C7—C6—C5    | 120.8 (3)   | C14—C12—C15  | 110.02 (19) |
| C6—C7—C8    | 120.1 (2)   | C13—C12—C15  | 110.83 (17) |
| C7—C8—C8A   | 120.0 (3)   | O2—C13—C12   | 112.00 (16) |

**Table S6. Geometric parameters (Å, °) for 2b.**

|        |             |        |           |
|--------|-------------|--------|-----------|
| P1—O1  | 1.446 (4)   | C3—C4  | 1.527 (6) |
| P1—O2  | 1.544 (3)   | C4—C5  | 1.512 (5) |
| P1—O3  | 1.551 (3)   | C4—C9  | 1.527 (6) |
| P1—S1B | 2.0006 (10) | C4—C10 | 1.529 (6) |
| P1—S1A | 2.0006 (10) | C5—O3  | 1.471 (5) |
| O2—C3  | 1.470 (5)   |        |           |
|        |             |        |           |

|           |             |           |           |
|-----------|-------------|-----------|-----------|
| O1—P1—O2  | 114.5 (2)   | O2—C3—C4  | 111.1 (3) |
| O1—P1—O3  | 114.4 (2)   | C5—C4—C3  | 108.3 (3) |
| O2—P1—O3  | 106.97 (17) | C5—C4—C9  | 107.1 (3) |
| O1—P1—S1B | 112.7 (5)   | C3—C4—C9  | 108.7 (4) |
| O2—P1—S1B | 106.6 (7)   | C5—C4—C10 | 111.5 (3) |
| O3—P1—S1B | 100.5 (7)   | C3—C4—C10 | 110.4 (4) |
| O1—P1—S1A | 110.5 (6)   | C9—C4—C10 | 110.7 (4) |
| O2—P1—S1A | 101.0 (4)   | O3—C5—C4  | 111.8 (3) |
| O3—P1—S1A | 108.5 (5)   | C5—O3—P1  | 119.0 (2) |
| C3—O2—P1  | 119.4 (2)   |           |           |

**Table S7. Geometric parameters (Å, °) for 3.**

|              |             |             |           |
|--------------|-------------|-------------|-----------|
| C99—O99      | 1.4489 (10) | N10—C4A     | 1.368 (4) |
| O98—C98      | 1.4496 (10) | C1—C2       | 1.377 (4) |
| O96—C96      | 1.4489 (10) | C1—C9A      | 1.390 (4) |
| S9—O5A       | 1.497 (3)   | C2—C3       | 1.385 (5) |
| S9—O5B       | 1.497 (5)   | C3—C4       | 1.372 (5) |
| S9—C9A       | 1.765 (3)   | C4—C4A      | 1.407 (4) |
| S9—C8A       | 1.769 (3)   | C4A—C9A     | 1.408 (4) |
| N1—O2        | 1.227 (4)   | C5—C6       | 1.372 (5) |
| N1—O1        | 1.233 (4)   | C5—C10A     | 1.412 (4) |
| N1—C2        | 1.461 (4)   | C6—C7       | 1.388 (5) |
| N2—O4        | 1.218 (4)   | C7—C8       | 1.384 (4) |
| N2—O3        | 1.229 (4)   | C8—C8A      | 1.391 (4) |
| N2—C7        | 1.453 (4)   | C8A—C10A    | 1.403 (4) |
| N10—C10A     | 1.363 (4)   |             |           |
|              |             |             |           |
| O5A—S9—C9A   | 105.78 (14) | N10—C4A—C4  | 118.6 (3) |
| O5B—S9—C9A   | 108.4 (17)  | N10—C4A—C9A | 122.7 (3) |
| O5A—S9—C8A   | 105.69 (14) | C4—C4A—C9A  | 118.7 (3) |
| O5B—S9—C8A   | 109.5 (17)  | C6—C5—C10A  | 120.8 (3) |
| C9A—S9—C8A   | 98.32 (15)  | C5—C6—C7    | 119.1 (3) |
| O2—N1—O1     | 123.7 (3)   | C8—C7—C6    | 122.2 (3) |
| O2—N1—C2     | 119.1 (3)   | C8—C7—N2    | 119.0 (3) |
| O1—N1—C2     | 117.2 (3)   | C6—C7—N2    | 118.8 (3) |
| O4—N2—O3     | 123.6 (3)   | C7—C8—C8A   | 118.5 (3) |
| O4—N2—C7     | 118.4 (3)   | C8—C8A—C10A | 120.8 (3) |
| O3—N2—C7     | 118.0 (3)   | C8—C8A—S9   | 115.3 (2) |
| C10A—N10—C4A | 124.5 (3)   | C10A—C8A—S9 | 123.3 (2) |

|           |           |              |           |
|-----------|-----------|--------------|-----------|
| C2—C1—C9A | 118.5 (3) | C1—C9A—C4A   | 120.5 (3) |
| C1—C2—C3  | 122.5 (3) | C1—C9A—S9    | 115.3 (2) |
| C1—C2—N1  | 118.1 (3) | C4A—C9A—S9   | 123.4 (2) |
| C3—C2—N1  | 119.3 (3) | N10—C10A—C8A | 123.1 (3) |
| C4—C3—C2  | 119.0 (3) | N10—C10A—C5  | 118.3 (3) |
| C3—C4—C4A | 120.8 (3) | C8A—C10A—C5  | 118.6 (3) |

**Table S8. Geometric parameters (Å, °) for 5.**

|                        |             |             |             |
|------------------------|-------------|-------------|-------------|
| N1—C2                  | 1.338 (2)   | C5—C13      | 1.508 (3)   |
| N1—C3 <sup>i</sup>     | 1.344 (2)   | C6—C7       | 1.399 (3)   |
| N11—C10                | 1.333 (3)   | C7—C8       | 1.399 (3)   |
| N11—C6                 | 1.361 (2)   | C8—C9       | 1.367 (3)   |
| C2—C3                  | 1.417 (3)   | C9—C10      | 1.394 (3)   |
| C2—C7                  | 1.446 (3)   | C10—C12     | 1.506 (3)   |
| C3—C4                  | 1.424 (3)   | C13—C15     | 1.520 (3)   |
| C4—C5                  | 1.346 (3)   | C13—C14     | 1.524 (3)   |
| C5—C6                  | 1.463 (3)   |             |             |
|                        |             |             |             |
| C2—N1—C3 <sup>i</sup>  | 116.67 (17) | N11—C6—C5   | 117.68 (18) |
| C10—N11—C6             | 118.11 (18) | C7—C6—C5    | 120.12 (18) |
| N1—C2—C3               | 121.72 (18) | C8—C7—C6    | 118.14 (18) |
| N1—C2—C7               | 119.85 (17) | C8—C7—C2    | 121.64 (19) |
| C3—C2—C7               | 118.43 (18) | C6—C7—C2    | 120.22 (17) |
| N1 <sup>i</sup> —C3—C2 | 121.61 (18) | C9—C8—C7    | 119.4 (2)   |
| N1 <sup>i</sup> —C3—C4 | 118.90 (18) | C8—C9—C10   | 119.3 (2)   |
| C2—C3—C4               | 119.48 (18) | N11—C10—C9  | 122.83 (19) |
| C5—C4—C3               | 123.27 (18) | N11—C10—C12 | 116.5 (2)   |
| C4—C5—C6               | 118.40 (19) | C9—C10—C12  | 120.7 (2)   |
| C4—C5—C13              | 122.96 (19) | C5—C13—C15  | 110.08 (19) |
| C6—C5—C13              | 118.62 (18) | C5—C13—C14  | 113.83 (19) |
| N11—C6—C7              | 122.19 (18) | C15—C13—C14 | 110.8 (2)   |

Symmetrycode(s): (i) -x, -y, -z+1.

**Table S9. Geometric parameters (Å, °) for 6a.**

|        |             |        |             |
|--------|-------------|--------|-------------|
| N4—C3  | 1.3331 (18) | C4A—C5 | 1.4618 (19) |
| N4—C4A | 1.3576 (19) | C5—C6  | 1.349 (2)   |
| N7—C6A | 1.3387 (19) | C5—C14 | 1.5161 (19) |
| N7—C7A | 1.3418 (18) | C6—C6A | 1.433 (2)   |

|               |             |               |             |
|---------------|-------------|---------------|-------------|
| N12—C12A      | 1.3353 (18) | C6A—C12A      | 1.433 (2)   |
| N12—C11A      | 1.3555 (19) | C7A—C8        | 1.417 (2)   |
| N17—C10       | 1.3719 (19) | C7A—C11A      | 1.435 (2)   |
| N17—C19       | 1.447 (2)   | C8—C9         | 1.353 (2)   |
| N17—C18       | 1.4523 (19) | C9—C10        | 1.440 (2)   |
| C1—C2         | 1.365 (2)   | C10—C11       | 1.386 (2)   |
| C1—C12B       | 1.4045 (19) | C11—C11A      | 1.408 (2)   |
| C2—C3         | 1.4038 (19) | C12A—C12B     | 1.443 (2)   |
| C3—C13        | 1.496 (2)   | C14—C16       | 1.524 (2)   |
| C4A—C12B      | 1.4094 (19) | C14—C15       | 1.527 (2)   |
|               |             |               |             |
| C3—N4—C4A     | 118.50 (12) | N7—C7A—C8     | 119.81 (13) |
| C6A—N7—C7A    | 116.68 (12) | N7—C7A—C11A   | 122.29 (14) |
| C12A—N12—C11A | 116.86 (13) | C8—C7A—C11A   | 117.89 (13) |
| C10—N17—C19   | 119.44 (14) | C9—C8—C7A     | 121.20 (14) |
| C10—N17—C18   | 121.80 (13) | C8—C9—C10     | 121.72 (15) |
| C19—N17—C18   | 118.75 (13) | N17—C10—C11   | 122.22 (14) |
| C2—C1—C12B    | 119.55 (13) | N17—C10—C9    | 119.85 (14) |
| C1—C2—C3      | 119.56 (13) | C11—C10—C9    | 117.93 (14) |
| N4—C3—C2      | 122.32 (14) | C10—C11—C11A  | 121.19 (14) |
| N4—C3—C13     | 117.75 (12) | N12—C11A—C11  | 119.42 (13) |
| C2—C3—C13     | 119.93 (13) | N12—C11A—C7A  | 120.57 (13) |
| N4—C4A—C12B   | 122.48 (13) | C11—C11A—C7A  | 120.00 (14) |
| N4—C4A—C5     | 117.44 (12) | N12—C12A—C6A  | 122.11 (14) |
| C12B—C4A—C5   | 120.07 (13) | N12—C12A—C12B | 119.93 (13) |
| C6—C5—C4A     | 118.49 (13) | C6A—C12A—C12B | 117.95 (13) |
| C6—C5—C14     | 123.32 (13) | C1—C12B—C4A   | 117.60 (14) |
| C4A—C5—C14    | 118.19 (13) | C1—C12B—C12A  | 121.63 (13) |
| C5—C6—C6A     | 123.36 (13) | C4A—C12B—C12A | 120.77 (13) |
| N7—C6A—C12A   | 121.45 (13) | C5—C14—C16    | 113.27 (13) |
| N7—C6A—C6     | 119.20 (13) | C5—C14—C15    | 109.86 (12) |
| C12A—C6A—C6   | 119.34 (14) | C16—C14—C15   | 110.54 (12) |

**Table S10.** The experimental aromatic  $^1\text{H}$  chemical shifts of compounds **1**, **2**, **3**, **5** and **6**.

|           | Solvent            | Aromatic                                             |
|-----------|--------------------|------------------------------------------------------|
| <b>1</b>  | DMSO- $\text{d}_6$ | 7.25, 7.31, 7.41, 7.50, 7.64, 7.69, 7.73, 7.95, 8.11 |
| <b>2a</b> | $\text{CDCl}_3$    | 7.17, 7.26, 7.34, 7.60                               |



|           |                     |                                                |
|-----------|---------------------|------------------------------------------------|
| <b>3</b>  | DMSO-d <sub>6</sub> | 7.54, 8.41, 8.88                               |
| <b>5</b>  | CDCl <sub>3</sub>   | 7.58, 8.21, 9.57                               |
| <b>6a</b> | CDCl <sub>3</sub>   | 7.23, 7.51, 7.57, 8.00, 8.08, 9.48             |
| <b>6b</b> | CDCl <sub>3</sub>   | 7.23, 7.52, 7.57, 7.98, 8.08, 9.48             |
| <b>6c</b> | CDCl <sub>3</sub>   | 7.24, 7.62, 8.11, 8.13, 8.18, 9.06, 9.63       |
| <b>6d</b> | CDCl <sub>3</sub>   | 7.25, 7.65, 7.93, 8.03, 8.12, 8.89, 9.10, 9.28 |
| <b>6e</b> | CDCl <sub>3</sub>   | 7.07, 7.52, 7.93                               |

For clarity the coupling constants are omitted.

**Table S11.** The experimental aromatic  $^{13}\text{C}\{^1\text{H}\}$  chemical shifts of compounds **1**, **2**, **3**, **5** and **6**.

|           | Solvent             | Aromatic                                                                                                                            |
|-----------|---------------------|-------------------------------------------------------------------------------------------------------------------------------------|
| <b>1</b>  | DMSO-d <sub>6</sub> | 124.8, 125.1, 127.2, 127.5, 127.7, 127.9, 128.0, 128.1, 128.4, 130.2, 130.3, 130.9, 134.8, 135.9, 138.6, 139.7, 145.3, 149.8, 169.5 |
| <b>2a</b> | CDCl <sub>3</sub>   | 123.6, 126.0, 126.8, 127.7, 127.6, 130.0, 139.5                                                                                     |
| <b>3</b>  | DMSO-d <sub>6</sub> | 116.8, 120.8, 121.2, 131.2, 132.7, 136.8                                                                                            |
| <b>5</b>  | CDCl <sub>3</sub>   | 122.4, 124.2, 125.5, 133.2, 140.6, 141.3, 148.2, 151.7, 160.1                                                                       |
| <b>6a</b> | CDCl <sub>3</sub>   | 104.3, 121.5, 122.0, 124.1, 125.6, 129.8, 133.3, 138.2, 140.1, 141.7, 144.1, 148.7, 149.4, 151.0, 159.9                             |
| <b>6b</b> | CDCl <sub>3</sub>   | 104.3, 121.5, 122.1, 124.0, 129.4, 129.9, 133.2, 138.2, 139.3, 140.0, 142.0, 144.1, 149.8, 151.1, 160.2                             |
| <b>6c</b> | CDCl <sub>3</sub>   | 103.7, 121.9, 122.0, 126.7, 130.0, 130.6, 131.4, 133.3, 138.4, 139.6, 141.9, 144.4, 149.9, 151.29, 151.34                           |
| <b>6d</b> | CDCl <sub>3</sub>   | 103.9, 118.2, 122.8, 126.9, 128.4, 129.4, 130.0, 136.4, 139.3, 141.16, 141.25, 144.7, 146.1, 150.5, 151.5                           |
| <b>6e</b> | CDCl <sub>3</sub>   | 104.3, 122.5, 129.1, 139.6, 143.2, 149.8                                                                                            |

For clarity the coupling constants are omitted.

**Table S12.** The optimized Cartesian coordinates of the **1** in the ground state calculated at the DFT/B3LYP/6-31G(d,p) level of theory

| Center<br>Number | Atomic<br>Number | Coordinates (Angstroms) |           |           |
|------------------|------------------|-------------------------|-----------|-----------|
|                  |                  | X                       | Y         | Z         |
| 1                | 16               | 3.381161                | 0.842508  | 2.373874  |
| 2                | 8                | 5.138311                | 2.510752  | -2.191728 |
| 3                | 7                | 2.266011                | 0.083748  | -1.400038 |
| 4                | 7                | 3.853086                | 1.566673  | -0.520683 |
| 5                | 7                | 1.676097                | -0.834409 | 1.204451  |
| 6                | 6                | 0.157442                | -2.460855 | 0.286322  |
| 7                | 1                | -0.044953               | -2.802598 | 1.295921  |
| 8                | 6                | -0.459787               | -3.019016 | -0.813214 |
| 9                | 1                | -1.171867               | -3.828025 | -0.681725 |
| 10               | 6                | -0.176868               | -2.545779 | -2.117462 |
| 11               | 1                | -0.675310               | -2.998478 | -2.969223 |
| 12               | 6                | 0.723994                | -1.520345 | -2.314220 |
| 13               | 1                | 0.960391                | -1.143681 | -3.303737 |
| 14               | 6                | 1.371923                | -0.930606 | -1.203204 |
| 15               | 6                | 2.856229                | 0.578589  | -0.341996 |
| 16               | 6                | 3.820910                | 2.709418  | 0.348724  |
| 17               | 6                | 3.973574                | 4.021330  | -0.117586 |
| 18               | 1                | 4.114728                | 4.190458  | -1.174312 |
| 19               | 6                | 3.975954                | 5.085612  | 0.783703  |
| 20               | 1                | 4.112314                | 6.094764  | 0.407705  |
| 21               | 6                | 3.789191                | 4.864574  | 2.147246  |
| 22               | 1                | 3.781197                | 5.695811  | 2.845258  |

|    |   |          |           |           |
|----|---|----------|-----------|-----------|
| 23 | 6 | 3.586854 | 3.567220  | 2.612531  |
| 24 | 1 | 3.405916 | 3.380616  | 3.666456  |
| 25 | 6 | 3.612616 | 2.490780  | 1.722273  |
| 26 | 6 | 2.531403 | 0.128530  | 0.984909  |
| 27 | 6 | 1.081453 | -1.403578 | 0.112370  |
| 28 | 6 | 4.712258 | 1.505414  | -1.649890 |
| 29 | 6 | 5.166550 | 0.147572  | -2.091375 |
| 30 | 6 | 5.460074 | -0.027599 | -3.450023 |
| 31 | 1 | 5.283311 | 0.795959  | -4.133286 |
| 32 | 6 | 5.971300 | -1.239718 | -3.905737 |
| 33 | 1 | 6.183533 | -1.373683 | -4.962258 |
| 34 | 6 | 6.218598 | -2.277966 | -3.004322 |
| 35 | 1 | 6.623933 | -3.221113 | -3.359025 |
| 36 | 6 | 5.954188 | -2.098790 | -1.645277 |
| 37 | 1 | 6.163774 | -2.896479 | -0.939040 |
| 38 | 6 | 5.426066 | -0.892348 | -1.188667 |
| 39 | 1 | 5.239709 | -0.750838 | -0.128591 |

**Table S13.** The optimized Cartesian coordinates of the **2a** in the ground state calculated at the DFT/B3LYP/6-31G(d,p) level of theory

| Center<br>Number | Atomic<br>Number | Coordinates (Angstroms) |           |          |
|------------------|------------------|-------------------------|-----------|----------|
|                  |                  | X                       | Y         | Z        |
| 1                | 15               | 1.635666                | 2.345068  | 7.105656 |
| 2                | 16               | 2.123670                | 5.985995  | 4.502069 |
| 3                | 8                | 2.467413                | 1.458587  | 6.049936 |
| 4                | 8                | 0.099311                | 2.202104  | 6.645891 |
| 5                | 8                | 1.871223                | 1.968264  | 8.511804 |
| 6                | 6                | 4.848026                | 5.648356  | 4.919068 |
| 7                | 1                | 4.981514                | 6.411466  | 4.158633 |
| 8                | 6                | 5.951446                | 5.038692  | 5.515541 |
| 9                | 1                | 6.953914                | 5.321031  | 5.209454 |
| 10               | 6                | 5.762611                | 4.085580  | 6.517496 |
| 11               | 1                | 6.618396                | 3.623605  | 6.999647 |
| 12               | 6                | 4.476304                | 3.735286  | 6.926148 |
| 13               | 1                | 4.326160                | 3.019681  | 7.727683 |
| 14               | 6                | 3.364808                | 4.307337  | 6.297931 |
| 15               | 6                | 0.260226                | 5.059037  | 7.987048 |
| 16               | 1                | 0.328898                | 4.274689  | 8.733486 |
| 17               | 6                | -0.655258               | 6.100689  | 8.132455 |
| 18               | 1                | -1.313409               | 6.114045  | 8.995541 |
| 19               | 6                | -0.710286               | 7.130418  | 7.191910 |
| 20               | 1                | -1.413320               | 7.948300  | 7.315027 |
| 21               | 6                | 0.156773                | 7.121378  | 6.099605 |
| 22               | 1                | 0.143581                | 7.930564  | 5.376100 |
| 23               | 6                | 1.048884                | 6.060586  | 5.927885 |
| 24               | 6                | 3.556834                | 5.273124  | 5.296764 |
| 25               | 7                | 2.024840                | 3.949176  | 6.650776 |
| 26               | 6                | 1.099051                | 5.018739  | 6.868091 |
| 27               | 6                | 2.107062                | 1.528938  | 4.646322 |
| 28               | 1                | 2.377039                | 2.518823  | 4.260663 |
| 29               | 1                | 2.730016                | 0.778963  | 4.152931 |
| 30               | 6                | 0.612265                | 1.242698  | 4.414261 |
| 31               | 6                | -0.210881               | 2.256486  | 5.229661 |
| 32               | 1                | -1.279215               | 2.037264  | 5.162008 |
| 33               | 1                | -0.037999               | 3.276788  | 4.868293 |
| 34               | 6                | 0.304236                | 1.457297  | 2.922619 |
| 35               | 1                | 0.882059                | 0.763056  | 2.303627 |
| 36               | 1                | -0.755894               | 1.277356  | 2.715865 |
| 37               | 1                | 0.543469                | 2.476770  | 2.601320 |
| 38               | 6                | 0.266187                | -0.196605 | 4.834300 |
| 39               | 1                | 0.478276                | -0.367970 | 5.891645 |
| 40               | 1                | -0.795705               | -0.402759 | 4.663225 |
| 41               | 1                | 0.846996                | -0.918301 | 4.250181 |

**Table S14.** The optimized Cartesian coordinates of the **3** in the ground state calculated at the DFT/B3LYP/6-31G(d,p) level of theory

| Center<br>Number | Atomic<br>Number | Coordinates (Angstroms) |           |           |
|------------------|------------------|-------------------------|-----------|-----------|
|                  |                  | X                       | Y         | Z         |
| 1                | 6                | -3.560394               | 1.533115  | -0.231283 |
| 2                | 6                | -3.636074               | 0.142933  | -0.332716 |
| 3                | 6                | -2.354168               | 2.123289  | 0.116032  |
| 4                | 6                | -1.223640               | 1.331093  | 0.382099  |
| 5                | 6                | -1.342989               | -0.069001 | 0.313855  |
| 6                | 6                | -2.537065               | -0.668306 | -0.062590 |
| 7                | 1                | -2.613747               | -1.747266 | -0.140439 |
| 8                | 1                | -4.438657               | 2.130099  | -0.443034 |
| 9                | 1                | -2.274381               | 3.206628  | 0.159182  |
| 10               | 7                | -4.906851               | -0.477814 | -0.719700 |
| 11               | 8                | -4.941966               | -1.704898 | -0.796566 |
| 12               | 8                | -5.859629               | 0.270124  | -0.943517 |
| 13               | 7                | -0.000007               | 1.930166  | 0.676179  |
| 14               | 6                | 1.223630                | 1.331102  | 0.382099  |
| 15               | 6                | 1.342989                | -0.068992 | 0.313855  |
| 16               | 16               | 0.000004                | -1.153472 | 0.891748  |
| 17               | 6                | 2.354152                | 2.123306  | 0.116032  |
| 18               | 6                | 3.560382                | 1.533140  | -0.231283 |
| 19               | 6                | 3.636071                | 0.142959  | -0.332716 |
| 20               | 6                | 2.537068                | -0.668288 | -0.062590 |
| 21               | 1                | 2.613759                | -1.747248 | -0.140439 |
| 22               | 1                | 4.438641                | 2.130130  | -0.443035 |
| 23               | 1                | 2.274358                | 3.206645  | 0.159182  |
| 24               | 1                | -0.000011               | 2.942240  | 0.673562  |
| 25               | 7                | 4.906852                | -0.477778 | -0.719700 |
| 26               | 8                | 5.859625                | 0.270169  | -0.943508 |
| 27               | 8                | 4.941977                | -1.704863 | -0.796553 |
| 28               | 8                | 0.000008                | -2.425470 | 0.086265  |

**Table S15.** The optimized Cartesian coordinates of the **5** in the ground state calculated at the DFT/B3LYP/6-31G(d,p) level of theory

| Center<br>Number | Atomic<br>Number | Coordinates (Angstroms) |           |          |
|------------------|------------------|-------------------------|-----------|----------|
|                  |                  | X                       | Y         | Z        |
| 1                | 7                | -0.341152               | 1.321275  | 0.367366 |
| 2                | 7                | 3.435543                | 1.322745  | 3.388064 |
| 3                | 6                | 0.712325                | 0.698378  | 0.906868 |
| 4                | 6                | 1.062485                | -0.639538 | 0.537923 |
| 5                | 6                | 2.201550                | -1.269882 | 1.140830 |
| 6                | 1                | 2.406262                | -2.284774 | 0.818782 |
| 7                | 6                | 2.987590                | -0.643377 | 2.065583 |
| 8                | 6                | 2.648695                | 0.720991  | 2.461546 |
| 9                | 6                | 1.528713                | 1.379295  | 1.891640 |
| 10               | 6                | 1.248355                | 2.692628  | 2.315338 |
| 11               | 1                | 0.394152                | 3.205777  | 1.887185 |
| 12               | 6                | 2.060572                | 3.287117  | 3.256582 |
| 13               | 1                | 1.867387                | 4.298643  | 3.601109 |
| 14               | 6                | 3.158106                | 2.562673  | 3.777570 |
| 15               | 6                | 4.065446                | 3.181974  | 4.811019 |
| 16               | 1                | 4.849652                | 2.475396  | 5.085669 |
| 17               | 1                | 3.505959                | 3.457704  | 5.712355 |
| 18               | 1                | 4.531298                | 4.097699  | 4.429085 |
| 19               | 6                | 4.213968                | -1.299221 | 2.681074 |
| 20               | 1                | 4.256500                | -0.957609 | 3.720671 |
| 21               | 6                | 4.165181                | -2.833061 | 2.677039 |
| 22               | 1                | 3.247734                | -3.211388 | 3.138874 |
| 23               | 1                | 5.015852                | -3.232257 | 3.238536 |
| 24               | 1                | 4.228121                | -3.243817 | 1.663208 |
| 25               | 6                | 5.499022                | -0.791406 | 1.992225 |
| 26               | 1                | 5.511326                | -1.073833 | 0.933534 |
| 27               | 1                | 6.383597                | -1.227421 | 2.469321 |
| 28               | 1                | 5.575549                | 0.295996  | 2.062337 |

|    |   |           |           |           |
|----|---|-----------|-----------|-----------|
| 29 | 7 | 0.341152  | -1.321275 | -0.367366 |
| 30 | 7 | -3.435543 | -1.322745 | -3.388064 |
| 31 | 6 | -0.712325 | -0.698378 | -0.906868 |
| 32 | 6 | -1.062485 | 0.639538  | -0.537923 |
| 33 | 6 | -2.201550 | 1.269882  | -1.140830 |
| 34 | 1 | -2.406262 | 2.284774  | -0.818782 |
| 35 | 6 | -2.987590 | 0.643377  | -2.065583 |
| 36 | 6 | -2.648695 | -0.720991 | -2.461546 |
| 37 | 6 | -1.528713 | -1.379295 | -1.891640 |
| 38 | 6 | -1.248355 | -2.692628 | -2.315338 |
| 39 | 1 | -0.394152 | -3.205777 | -1.887185 |
| 40 | 6 | -2.060572 | -3.287117 | -3.256582 |
| 41 | 1 | -1.867387 | -4.298643 | -3.601109 |
| 42 | 6 | -3.158106 | -2.562673 | -3.777570 |
| 43 | 6 | -4.065446 | -3.181974 | -4.811019 |
| 44 | 1 | -4.849652 | -2.475396 | -5.085669 |
| 45 | 1 | -3.505959 | -3.457704 | -5.712355 |
| 46 | 1 | -4.531298 | -4.097699 | -4.429085 |
| 47 | 6 | -4.213968 | 1.299221  | -2.681074 |
| 48 | 1 | -4.256500 | 0.957609  | -3.720671 |
| 49 | 6 | -4.165181 | 2.833061  | -2.677039 |
| 50 | 1 | -3.247734 | 3.211388  | -3.138874 |
| 51 | 1 | -5.015852 | 3.232257  | -3.238536 |
| 52 | 1 | -4.228121 | 3.243817  | -1.663208 |
| 53 | 6 | -5.499022 | 0.791406  | -1.992225 |
| 54 | 1 | -5.511326 | 1.073833  | -0.933534 |
| 55 | 1 | -6.383597 | 1.227421  | -2.469321 |
| 56 | 1 | -5.575549 | -0.295996 | -2.062337 |

**Table S16.** The optimized Cartesian coordinates of the **6a** in the ground state calculated at the DFT/B3LYP/6-31G(d,p) level of theory

| Center<br>Number | Atomic<br>Number | Coordinates (Angstroms) |           |           |
|------------------|------------------|-------------------------|-----------|-----------|
|                  |                  | X                       | Y         | Z         |
| 1                | 7                | 3.916985                | 1.003027  | -0.092781 |
| 2                | 7                | -0.767546               | -1.947836 | -0.083973 |
| 3                | 7                | -0.913156               | 0.888554  | -0.032574 |
| 4                | 7                | -5.724534               | 0.620479  | -0.009555 |
| 5                | 6                | 1.504699                | 2.409490  | -0.049158 |
| 6                | 1                | 0.555860                | 2.934703  | -0.033380 |
| 7                | 6                | 2.710531                | 3.078624  | -0.057598 |
| 8                | 1                | 2.746935                | 4.163990  | -0.048079 |
| 9                | 6                | 3.910502                | 2.332724  | -0.080447 |
| 10               | 6                | 2.740948                | 0.327887  | -0.083428 |
| 11               | 6                | 2.795642                | -1.132671 | -0.103277 |
| 12               | 6                | 1.621861                | -1.828022 | -0.107415 |
| 13               | 1                | 1.607096                | -2.912021 | -0.130552 |
| 14               | 6                | 0.335218                | -1.188698 | -0.083042 |
| 15               | 6                | -1.947646               | -1.305436 | -0.059661 |
| 16               | 6                | -3.162026               | -2.049233 | -0.053747 |
| 17               | 1                | -3.092088               | -3.132109 | -0.067282 |
| 18               | 6                | -4.374912               | -1.418406 | -0.028466 |
| 19               | 1                | -5.275178               | -2.019925 | -0.021243 |
| 20               | 6                | -4.479330               | 0.019630  | -0.011328 |
| 21               | 6                | -3.301024               | 0.763846  | -0.005098 |
| 22               | 1                | -3.300904               | 1.845277  | 0.022583  |
| 23               | 6                | -2.035554               | 0.131783  | -0.034049 |
| 24               | 6                | 0.253120                | 0.245991  | -0.057330 |
| 25               | 6                | 1.493387                | 1.002762  | -0.062035 |
| 26               | 6                | 5.248442                | 3.029641  | -0.093407 |
| 27               | 1                | 6.050250                | 2.290173  | -0.105139 |
| 28               | 1                | 5.369459                | 3.669142  | 0.788588  |
| 29               | 1                | 5.349301                | 3.674296  | -0.974231 |
| 30               | 6                | 4.156384                | -1.812925 | -0.096332 |
| 31               | 1                | 4.814257                | -1.193034 | -0.714998 |
| 32               | 6                | 4.754015                | -1.813533 | 1.327007  |
| 33               | 1                | 4.837127                | -0.795904 | 1.715240  |
| 34               | 1                | 5.755018                | -2.259146 | 1.319955  |
| 35               | 1                | 4.128195                | -2.397278 | 2.011444  |
| 36               | 6                | 4.141802                | -3.232639 | -0.678841 |
| 37               | 1                | 3.580101                | -3.930202 | -0.047437 |

|    |   |           |           |           |
|----|---|-----------|-----------|-----------|
| 38 | 1 | 5.164997  | -3.615602 | -0.749669 |
| 39 | 1 | 3.701461  | -3.255268 | -1.680681 |
| 40 | 6 | -6.931498 | -0.170531 | 0.174261  |
| 41 | 1 | -7.052236 | -0.912620 | -0.623369 |
| 42 | 1 | -7.796953 | 0.491706  | 0.135506  |
| 43 | 1 | -6.952331 | -0.698703 | 1.138651  |
| 44 | 6 | -5.810111 | 2.066070  | 0.109268  |
| 45 | 1 | -5.396257 | 2.434982  | 1.059612  |
| 46 | 1 | -6.855072 | 2.371717  | 0.047964  |
| 47 | 1 | -5.267967 | 2.558128  | -0.706561 |

-----
